# Supplementary material for: Cyclization–carbonylation–cyclization coupling reaction of γ-propynyl-1,3-diketones with palladium(ii)-bisoxazoline catalyst
Source: Royal Society of Chemistry journal article supplement (doi:10.1039/c2ob07016b), 2012-01-01

## Electronic Supporting Information

# Cyclization-Carbonylation-Cyclization Coupling Reactions of $\gamma$ -Propynyl-1,3-diketones with Palladium(II)- Bisoxazoline Catalyst

Taichi Kusakabe<sup>a</sup>, Yasuko Kawai<sup>a</sup>, Shen Rong<sup>a</sup>, Tomoyuki Mochida<sup>b</sup> and Keisuke Kato<sup>\*a</sup>

<sup>a</sup>Faculty of Pharmaceutical Sciences, Toho University, 2-2-1 Miyama, Funabashi, Chiba 274-8510, Japan. <sup>b</sup>Department of Chemistry, Faculty of Science, Kobe University, Rokkodai, Nada, Kobe 657-8501, Japan.

### General Information.

All melting points were measured on a Yanaco MP-3S micro melting point apparatus and are uncorrected. <sup>1</sup>H, <sup>13</sup>C NMR and HMBC spectra were recorded on JEOL AL 400 and JEOL Lambda 500 spectrometer spectrometers in CDCl<sub>3</sub> with Me<sub>4</sub>Si as an internal reference. In the case of CD<sub>3</sub>CN, solvent peaks were used as a reference (1.93ppm for <sup>1</sup>H, and 118.2ppm for <sup>13</sup>C). <sup>13</sup>C NMR spectra were recorded at 100 MHz. High-resolution mass spectra (HR-MS) were obtained with JEOL GC Mate II, JMS-SX102 and JEOL JMS 600H spectrometer. IR spectra were recorded with JASCO FT/IR-300 spectrometer. All reagents were purchased from commercial sources and used without purification. All evaporations were performed under reduced pressure. For column chromatography, silica gel (Kieselgel 60) was employed.

### Preparation of substrates **1**, **2** and **5**.

The substrates **1**, **2** and **5** were prepared according to the literature.<sup>1</sup> The diketones **1** and **2** except **1a**, **1b**, **2a** and **5** are new compounds.<sup>1,2</sup>

Keto : enol = 7 : 3, Colorless powder, mp. 84-86°C ; <sup>1</sup>H- NMR (400 MHz, CDCl<sub>3</sub>) δ 1.11 (3H, t, *J* = 7.6 Hz), 1.65-2.78 (9.3H, m), 3.39-3.50 (1.4H, m), 5.47 (0.3H, s); <sup>13</sup>C-NMR (100 MHz, CDCl<sub>3</sub>, major isomer) δ 12.4 (CH<sub>2</sub>), 14.2 (CH<sub>3</sub>), 19.1 (CH<sub>2</sub>), 23.9 (CH<sub>2</sub>), 39.8 (CH<sub>2</sub>), 48.6 (CH), 58.2 (CH<sub>2</sub>), 75.8 (C), 84.1 (C) , 203.3 (C), 203.9 (C); HRMS-EI:*m/z* [*M*<sup>+</sup>] calcd for C<sub>11</sub>H<sub>14</sub>O<sub>2</sub> : 178.0994; found: 178.0993; IR (KBr): 2971, 2323, 1633, 1589, 1535, 1191 cm<sup>-1</sup>.

Keto : enol = 7 : 3. Pale yellow powder, mp. 46-48°C ; <sup>1</sup>H- NMR (400 MHz, CDCl<sub>3</sub>) δ 0.89 (3H, t, *J* = 7.2 Hz), 1.25-1.49 (8H, m), 1.69-2.74 (9.3H, m), 3.39-3.49 (1.4H, m), 5.46 (0.3H, s); <sup>13</sup>C-NMR (100 MHz, CDCl<sub>3</sub>, major isomer) δ 14.0 (CH<sub>3</sub>), 18.7 (CH<sub>2</sub>), 19.1 (CH<sub>2</sub>), 22.6 (CH<sub>2</sub>), 23.9 (CH<sub>2</sub>), 28.6 (CH<sub>2</sub>), 28.9 (CH<sub>2</sub>), 31.3 (CH<sub>2</sub>), 39.8 (CH<sub>2</sub>) , 48.7 (CH), 58.2 (CH<sub>2</sub>), 76.5 (C), 82.8 (C), 203.3 (C), 203.9 (C); HRMS-EI:*m/z* [*M*<sup>+</sup>] calcd for C<sub>15</sub>H<sub>22</sub>O<sub>2</sub> : 234.1620; found: 234.1618; IR (KBr): 2956, 2331, 1597, 1518, 1201 cm<sup>-1</sup>.

Keto : enol = 6 : 4. Colorless powder, mp. 81-83°C ; <sup>1</sup>H- NMR (400 MHz, CDCl<sub>3</sub>) δ 0.59-0.74 (4H, m), 1.17-1.23 (1H, m), 1.62-1.95 (1H, m), 2.19-2.79 (6H, m), 3.39-3.50 (1.2H, m), 5.45 (0.4H, s), 5.88 (0.4H, br-s); <sup>13</sup>C-NMR (100 MHz, CDCl<sub>3</sub>, major isomer) δ -0.5 (CH), 8.1 (2C, CH<sub>2</sub>), 19.1 (CH<sub>2</sub>), 23.9 (CH<sub>2</sub>), 39.8 (CH<sub>2</sub>), 48.6 (CH), 58.2 (CH<sub>2</sub>), 71.9 (C), 85.7 (C) , 203.3 (C), 203.9 (C); HRMS-EI:*m/z* [*M*<sup>+</sup>] calcd for C<sub>12</sub>H<sub>14</sub>O<sub>2</sub> : 190.0994; found: 190.0992; IR (KBr): 2887, 2334, 1604, 1531, 1202 cm<sup>-1</sup>.

Keto : enol = 1 : 1. Colorless powder, mp. 125-127°C ;  $^1\text{H}$ - NMR (400 MHz,  $\text{CDCl}_3$ )  $\delta$  1.69-1.79 (0.5H, m), 1.94-2.03 (0.5H, m), 2.28-2.33 (0.5H, m), 2.54-2.68 (3.5H, m), 2.75-2.80 (1H, m), 2.93-2.99 (1H, m), 3.42-3.53 (1H, m), 7.25-7.30 (3H, m), 7.37-7.40 (2H, m), 9.88 (0.5H, br-s);  $^{13}\text{C}$ -NMR (100 MHz,  $\text{CDCl}_3$ )  $\delta$  1.97 (0.5C,  $\text{CH}_2$ ), 20.7 (0.5C,  $\text{CH}_2$ ), 24.0 (0.5C,  $\text{CH}_2$ ), 26.1 (0.5C,  $\text{CH}_2$ ), 30.2 (0.5C,  $\text{CH}_2$ ), 39.8 (0.5C,  $\text{CH}_2$ ), 41.8 (0.5C, CH), 48.5 (0.5C, CH), 58.2 (0.5C,  $\text{CH}_2$ ), 82.4 (0.5C, CH), 82.7 (0.5C, CH), 86.5 (0.5C, CH), 87.4 (0.5C, CH), 104.3 (0.5C, CH), 123.2 (0.5C, C), 123.6 (0.5C, C), 127.8 (0.5C, CH), 128.0 (0.5C, CH), 128.2 (1C, CH), 128.3 (1C, CH), 131.6 (2C, CH), 188.0 (0.5C, C), 195.5 (0.5C, C), 202.9 (0.5C, C), 203.7 (0.5C, C); HRMS-EI: $m/z$  [ $\text{M}^+$ ] calcd for  $\text{C}_{15}\text{H}_{14}\text{O}_2$  : 226.0994; found: 226.0994; IR (KBr): 2950, 2335, 1616, 1490, 1200, 753, 690  $\text{cm}^{-1}$ .

Keto : enol = 4 : 1. Pale yellow powder, mp. 135-137°C ;  $^1\text{H}$ - NMR (400 MHz,  $\text{CDCl}_3$ )  $\delta$  1.70-1.80 (0.8H, m), 1.96-2.01 (0.2H, m), 2.30-2.35 (0.2H, m), 2.48-2.68 (3.2H, m), 2.72-2.81 (1.6H, m), 2.93-2.98 (1H, m), 3.42-3.51 (1.6H, m), 3.79 (0.6H, s), 3.80 (2.4H, s), 5.50 (0.2H, s), 6.79-6.84 (2H, m), 7.31-7.33 (2H, m);  $^{13}\text{C}$ -NMR (100 MHz,  $\text{CDCl}_3$ , major isomer)  $\delta$  19.7 ( $\text{CH}_2$ ), 24.1 ( $\text{CH}_2$ ), 39.9 ( $\text{CH}_2$ ), 48.6 ( $\text{CH}_3$ ), 55.3 ( $\text{CH}_3$ ), 58.2 ( $\text{CH}_2$ ), 82.5 (C), 84.9 (C), 113.9 (2C, CH), 115.4 (C), 133.0 (CH), 159.4 (C), 203.0 (C), 203.6 (C); HRMS-EI: $m/z$  [ $\text{M}^+$ ] calcd for  $\text{C}_{16}\text{H}_{16}\text{O}_3$  : 256.1100; found: 256.1103; IR (KBr): 2935, 1607, 1551, 1509, 1246, 1197, 1034, 832  $\text{cm}^{-1}$ .

Keto : enol = 7 : 3. Pale yellow powder, mp. 152-154°C ;  $^1\text{H}$ - NMR (400 MHz,  $\text{CDCl}_3$ )  $\delta$  1.75 (0.7H, qd,  $J$  = 13.2, 4.4 Hz), 1.98-2.01 (0.3H, m), 2.31-2.35 (0.3H, m), 2.46-2.81 (4.7H, m), 2.97-3.02 (1H, m), 3.43-3.55 (1.4H, m), 5.52 (0.3H, s), 7.48-7.56 (4H, m);  $^{13}\text{C}$ -NMR (100 MHz,  $\text{CDCl}_3$ )  $\delta$  19.7 ( $\text{CH}_2$ ), 24.1 ( $\text{CH}_2$ ), 39.9 ( $\text{CH}_2$ ), 48.4 (CH), 58.2 ( $\text{CH}_2$ ), 81.4 (C), 89.3 (C), 123.9 ( $^1J_{\text{C-F}}$  = 270.9 Hz, C), 125.2 ( $^3J_{\text{C-F}}$  = 3.3 Hz, CH), 127.1 (C), 129.8 ( $^2J_{\text{C-F}}$  = 32.1 Hz, C), 131.9 (CH), 202.5 (C), 203.3 (C); HRMS-EI: $m/z$  [ $\text{M}^+$ ] calcd for  $\text{C}_{16}\text{H}_{13}\text{O}_2\text{F}_3$  : 294.0868; found: 294.0870; IR (KBr): 2221, 1619, 1594, 1529, 1325, 841  $\text{cm}^{-1}$ .

Keto : enol = 3 : 1. Colorless powder, mp. 145-146°C ;  $^1\text{H}$ - NMR (400 MHz,  $\text{CDCl}_3$ )  $\delta$  1.69-1.79 (0.75H, m), 1.93-2.03 (0.75H, m), 2.29-2.34 (0.25H, m), 2.47-2.99 (5.85H, m), 3.42-3.51 (1.5H, m), 5.50 (0.25H, s), 7.25-7.32 (4H, m);  $^{13}\text{C}$ -NMR (100 MHz,  $\text{CDCl}_3$ , major isomer)  $\delta$  19.7 ( $\text{CH}_2$ ), 24.1 ( $\text{CH}_2$ ), 39.9 ( $\text{CH}_2$ ), 48.4 (CH), 58.2 ( $\text{CH}_2$ ), 81.6 (C), 87.6 (C), 121.7 (C), 128.6 (2C, CH), 132.8 (2C, CH), 134.0 (C), 202.7 (C), 203.4 (C); HRMS-EI: $m/z$  [ $\text{M}^+$ ] calcd for  $\text{C}_{15}\text{H}_{13}\text{O}_2\text{Cl}$  : 260.0604; found: 260.0601; IR (KBr): 2252, 1620, 1538, 1488, 1201, 1088  $\text{cm}^{-1}$ .

diastereomeric mixture, ratio = 25 : 1. Yellow oil ;  $^1\text{H}$ - NMR (400 MHz,  $\text{CDCl}_3$ , major isomer)  $\delta$  0.86 (3H, s), 1.27 (3H, s), 2.57-2.69 (3H, m), 2.85-2.88 (1H, m), 2.95-3.01 (1H, m), 3.43-5.34 (2H, m), 7.26-7.29 (3H, m), 7.35-7.38 (2H, m);  $^{13}\text{C}$ -NMR (100 MHz,  $\text{CDCl}_3$ , major isomer)  $\delta$  15.1 ( $\text{CH}_2$ ), 22.2 ( $\text{CH}_3$ ), 29.0 ( $\text{CH}_3$ ), 34.0 (C), 55.2 ( $\text{CH}_2$ ), 58.1 ( $\text{CH}_2$ ), 59.5 (CH), 81.8 (C), 88.1 (C), 123.4 (C), 127.9 (CH), 128.3 (2C, CH), 131.5 (2C, CH), 202.6 (C), 202.7 (C); HRMS-EI: $m/z$  [ $\text{M}^+$ ] calcd for  $\text{C}_{17}\text{H}_{18}\text{O}_2$  : 254.1307; found: 254.1305; IR (KBr): 2963, 2238, 1710, 1597, 757, 692  $\text{cm}^{-1}$ .

Enol form. Pale yellow powder, mp. 80-82°C ;  $^1\text{H}$ - NMR (400 MHz,  $\text{CDCl}_3$ )  $\delta$  1.07 (3H, t,  $J$  = 7.6 Hz), 2.08-2.15 (2H, m), 2.43-2.61 (3H, m), 2.70-2.76 (1H, m), 2.82-2.86 (1H, m), 5.31 (1H, s), 9.14-9.24 (1H, m);  $^{13}\text{C}$ -NMR (100 MHz,  $\text{CDCl}_3$ )  $\delta$  12.3 ( $\text{CH}_2$ ), 14.2 ( $\text{CH}_3$ ), 20.9 ( $\text{CH}_2$ ), 37.1 ( $\text{CH}_2$ ), 42.2 (CH), 74.8 (C), 83.9 (C), 105.7 (CH), 201.7 (C), 203.2 (C); HRMS-EI: $m/z$  [ $\text{M}^+$ ] calcd for  $\text{C}_{10}\text{H}_{12}\text{O}_2$  : 164.0837; found: 164.0830; IR (KBr): 2973, 1607, 1168, 819  $\text{cm}^{-1}$ .

Enol form. Yellow oil;  $^1\text{H}$ - NMR (400 MHz,  $\text{CDCl}_3$ )  $\delta$  0.88 (3H, t,  $J$  = 7.2 Hz), 1.23-1.35 (7H, m), 1.40-1.47 (2H, m), 2.08-2.12 (2H, m), 2.41-2.84 (5H, m), 5.30 (1H, s), 9.78 (1H, br-s);  $^{13}\text{C}$ -NMR (100 MHz,  $\text{CDCl}_3$ )  $\delta$  14.1 ( $\text{CH}_3$ ), 18.7 ( $\text{CH}_2$ ), 21.0 ( $\text{CH}_2$ ), 22.6 ( $\text{CH}_2$ ), 28.5 ( $\text{CH}_2$ ), 28.9 ( $\text{CH}_2$ ), 31.3 ( $\text{CH}_2$ ), 37.1 ( $\text{CH}_2$ ), 42.3 (CH), 75.5 (C), 82.5 (C), 105.7 (CH), 201.5 (C), 203.2 (C); HRMS-EI: $m/z$  [ $\text{M}^+$ ] calcd for  $\text{C}_{14}\text{H}_{20}\text{O}_2$  : 220.1463; found: 220.1461; IR (KBr): 2929, 2336, 1652, 1573, 1173, 833  $\text{cm}^{-1}$ .

Enol form. Pale yellow powder, mp. 102-104°C ; <sup>1</sup>H- NMR (400 MHz, CDCl<sub>3</sub>) δ 2.56-2.90 (5H, m), 5.35 (1H, s), 7.23-7.26 (3H, m), 7.32-7.34 (2H, m), 11.3 (1H, br-s ); <sup>13</sup>C-NMR (100 MHz, CDCl<sub>3</sub>) δ 21.5 (CH<sub>2</sub>), 37.1 (CH<sub>2</sub>), 42.0 (CH), 82.5 (C), 85.5 (C), 105.7 (CH), 123.2 (C), 128.0 (CH), 128.3 (2C, CH) , 131.7 (2C, CH), 201.6 (C), 203.1 (C); HRMS-EI:*m/z* [*M*<sup>+</sup>] calcd for C<sub>14</sub>H<sub>12</sub>O<sub>2</sub> : 212.0837; found: 212.0838; IR (KBr): 2334, 1598, 1522, 1490, 1167, 756 cm<sup>-1</sup>.

## General procedure for the CCC-coupling reaction of **1** or **2**

A 50 mL two-neck round-bottom flask containing a magnetic stirring bar, Pd(tfa)<sub>2</sub> (0.025 mmol or 0.05 mmol), ligand (0.038 mmol or 0.06 mmol), *p*-benzoquinone (1 mmol) and MeOH (4 mL) was fitted with a rubber septum and a three-way stopcock connected to a balloon filled with carbon monoxide. The apparatus was purged with carbon monoxide by pump-filling via the three-way stopcock. A MeOH (or CH<sub>2</sub>Cl<sub>2</sub>) solution (1 mL) of substrate **1** or **2** (0.5 mmol) was added to the stirred solution via syringe at an appropriate temperature. The remaining substrate was washed in MeOH (or CH<sub>2</sub>Cl<sub>2</sub>) (1 mL) twice. In the case of **1g-1i**, CH<sub>2</sub>Cl<sub>2</sub> was used instead of MeOH, because of their poor solubility in MeOH. After stirring for the period of time at the appropriate temperature, the mixture was diluted with CH<sub>2</sub>Cl<sub>2</sub> (50 mL) and washed with 3% NaOH (40 mL). The aqueous layer was extracted with CH<sub>2</sub>Cl<sub>2</sub> (50 mL) twice and the combined organic layers were dried over MgSO<sub>4</sub> and concentrated *in vacuo*. The crude product was purified by flash chromatography on silica gel. The fraction eluted with hexane / acetone (4/1-2/1) afforded dimeric ketone **6** or **9**. The product **6** or **9** was then precipitated from the reaction mixture and the resulting precipitate collected by filtration and washed with cold MeOH (1 mL × 2). The filtrate was reprocessed via the above procedure to provide additional product after flash chromatography.

Diastereomeric mixture, ratio = 1:1. Pale yellow powder, mp. 219-222°C ; <sup>1</sup>H- NMR (400 MHz, CDCl<sub>3</sub>) δ 1.76-1.87 (2H, m), 2.33-2.42 (4H, m), 2.55-2.66 (4H, m), 3.06-3.16 (2H, m), 3.79-3.88 (2H, m), 5.69 (2H, d, *J* = 2.4 Hz), 6.11-6.12 (2H, m); <sup>13</sup>C-NMR (100 MHz, CDCl<sub>3</sub>) δ 27.8 (2C, CH<sub>2</sub>), 34.0 (1C, CH<sub>2</sub>), 34.0 (1C, CH<sub>2</sub>), 36.8 (2C, CH<sub>2</sub>), 37.5 (1C, CH), 37.5 (1C, CH), 104.3 (2C, CH), 105.7 (1C, CH), 105.7 (1C, CH), 171.0 (1C, C), 171.1 (1C, C), 177.8 (1C, C), 177.8 (1C, C), 188.3 (1C, C), 198.3 (2C, C); HRMS-EI:*m/z* [*M*<sup>+</sup>] calcd for C<sub>19</sub>H<sub>18</sub>O<sub>5</sub> : 326.1154; found: 326.1128; IR (KBr): 2948, 1654, 1607, 1359, 1161, 1065, 1033 cm<sup>-1</sup>.

Diastereomeric mixture, ratio = 1:1. Colorless powder, mp. 205-208°C ; <sup>1</sup>H- NMR (400 MHz, CDCl<sub>3</sub>) δ 1.73-1.85 (2H, m), 1.96-1.98 (6H, m), 2.33-2.58 (8H, m), 3.06-3.12 (2H, m), 3.12-3.21 (1H, m ), 3.35-3.41 (1H, m), 5.69 (2H, d, *J* = 1.6 Hz); <sup>13</sup>C-NMR (100 MHz, CDCl<sub>3</sub>) δ 12.7 (1C, CH<sub>3</sub>), 12.8 (1C, CH<sub>3</sub>), 27.7 (1C, CH<sub>2</sub>), 27.8 (1C, CH<sub>2</sub>), 32.8 (1C, CH<sub>2</sub>), 33.7 (1C, CH<sub>2</sub>), 36.7 (1C, CH<sub>2</sub>) , 36.7 (1C, CH<sub>2</sub>), 38.2 (1C, CH), 38.3 (1C, CH), 103.6 (1C, CH), 103.7 (1C, CH), 113.4 (1C, C), 113.6 (1C, C), 160.8 (1C, C), 161.4 (1C, C), 178.3 (1C, C), 178.3 (1C, C), 197.5 (0.5C, C), 197.8 (0.5C, C), 198.5 (1C, C), 198.5 (1C, C); HRMS-EI:*m/z* [*M*<sup>+</sup>] calcd for C<sub>21</sub>H<sub>22</sub>O<sub>5</sub> : 354.1467; found: 354.1470; IR (KBr): 2948, 1631, 1367, 1172, 1151 cm<sup>-1</sup>.

Diastereomeric mixture, ratio = 1:1. Pale yellow powder, mp. 204-206°C ;  $^1\text{H}$ - NMR (400 MHz,  $\text{CDCl}_3$ )  $\delta$  1.03-1.07 (6H, m), 1.73-1.83 (2H, m), 2.32-2.58 (12H, m), 3.05-3.17 (3H, m), 3.24-3.33 (1H, m), 5.68 (2H, s);  $^{13}\text{C}$ -NMR (100 MHz,  $\text{CDCl}_3$ )  $\delta$  13.7 (1C,  $\text{CH}_3$ ), 13.8 (1C,  $\text{CH}_3$ ), 21.0 (1C,  $\text{CH}_2$ ), 21.0 (1C,  $\text{CH}_2$ ), 27.7 (1C,  $\text{CH}_2$ ), 27.7 (1C,  $\text{CH}_2$ ), 32.8 (1C,  $\text{CH}_2$ ), 33.5 (1C,  $\text{CH}_2$ ), 36.7 (1C,  $\text{CH}_2$ ), 36.7 (1C,  $\text{CH}_2$ ), 38.2 (1C, CH), 38.2 (1C, CH), 103.6 (1C, CH), 103.6 (1C, CH), 120.6 (1C, C), 120.8 (1C, C), 159.6 (1C, C), 160.0 (1C, C), 178.2 (1C, C), 178.2 (1C, C), 197.7 (0.5C, C), 197.8 (0.5C, C), 198.4 (1C, C), 198.4 (1C, C); HRMS-EI: $m/z$  [ $\text{M}^+$ ] calcd for  $\text{C}_{23}\text{H}_{26}\text{O}_5$ : 382.1780; found: 382.1783; IR (KBr): 2965, 1623, 1366, 1165  $\text{cm}^{-1}$ .

Diastereomeric mixture, ratio = 1:1. Pale yellow oil ;  $^1\text{H}$ - NMR (400 MHz,  $\text{CDCl}_3$ )  $\delta$  0.86-0.89 (6H, m), 1.27-1.42 (16H, m), 1.73-1.83 (2H, m), 2.29-2.57 (12H, m), 3.03-3.14 (3H, m), 3.26-3.32 (1H, m), 5.68 (2H, s);  $^{13}\text{C}$ -NMR (100 MHz,  $\text{CDCl}_3$ )  $\delta$  14.1 (2C,  $\text{CH}_3$ ), 22.6 (1C,  $\text{CH}_2$ ), 22.6 (1C,  $\text{CH}_2$ ), 27.6 (1C,  $\text{CH}_2$ ), 27.7 (2C,  $\text{CH}_2$ ), 27.8 (1C,  $\text{CH}_2$ ), 29.1 (1C,  $\text{CH}_2$ ), 29.1 (1C,  $\text{CH}_2$ ), 29.2 (1C,  $\text{CH}_2$ ), 29.3 (1C,  $\text{CH}_2$ ), 31.5 (1C,  $\text{CH}_2$ ), 31.6 (1C,  $\text{CH}_2$ ), 32.8 (1C,  $\text{CH}_2$ ), 33.5 (1C,  $\text{CH}_2$ ), 36.7 (1C,  $\text{CH}_2$ ), 36.7 (1C,  $\text{CH}_2$ ), 38.2 (2C, CH), 103.6 (1C, CH), 103.6 (1C, CH), 119.5 (1C, C), 119.7 (1C, C), 159.8 (1C, C), 160.2 (1C, C), 178.2 (1C, C), 178.3 (1C, C), 198.1 (0.5C, C), 198.2 (0.5C, C), 198.4 (1C, C), 198.4 (1C, C); HRMS-EI: $m/z$  [ $\text{M}^+$ ] calcd for  $\text{C}_{31}\text{H}_{42}\text{O}_5$ : 490.3032; found: 490.3031; IR (KBr): 2926, 1661, 1626, 1367, 1166  $\text{cm}^{-1}$ .

Diastereomeric mixture, ratio = 1:1. Pale yellow powder, mp. 184-186°C ;  $^1\text{H}$ - NMR (400 MHz,  $\text{CDCl}_3$ )  $\delta$  0.42-0.59 (4H, m), 0.75-0.95 (4H, m), 1.70-1.84 (2H, m), 2.32-2.58 (8H, m), 3.04-3.13 (2H, m), 3.17-3.23 (1H, m), 3.39-3.45 (1H, m), 5.71 (2H, d,  $J$  = 1.6 Hz);  $^{13}\text{C}$ -NMR (100 MHz,  $\text{CDCl}_3$ )  $\delta$  6.2 (1C,  $\text{CH}_2$ ), 6.7 (1C,  $\text{CH}_2$ ), 6.8 (1C,  $\text{CH}_2$ ), 7.3 (1C,  $\text{CH}_2$ ), 8.6 (1C,  $\text{CH}_3$ ), 8.7 (1C,  $\text{CH}_3$ ), 27.7 (1C,  $\text{CH}_2$ ), 27.7 (1C,  $\text{CH}_2$ ), 33.3 (1C,  $\text{CH}_2$ ), 34.1 (1C,  $\text{CH}_2$ ), 36.7 (2C,  $\text{CH}_2$ ), 37.9 (1C, CH), 38.0 (1C, CH), 103.7 (1C, CH), 103.7 (1C, CH), 119.9 (1C, C), 120.0 (1C, C), 163.3 (1C, C), 163.8 (1C, C), 178.5 (1C, C), 178.6 (1C, C), 196.8 (0.5C, C), 197.0 (0.5C, C), 198.5 (2C, C); HRMS-EI: $m/z$  [ $\text{M}^+$ ] calcd for  $\text{C}_{25}\text{H}_{26}\text{O}_5$ : 406.1780; found: 406.1775; IR (KBr): 3008, 1656, 1615, 1151, 1113  $\text{cm}^{-1}$ .

Diastereomeric mixture, ratio = 1:1. Pale yellow powder, mp. 213-215°C ;  $^1\text{H}$ - NMR (400 MHz,  $\text{CDCl}_3$ )  $\delta$  1.77-1.88 (2H, m), 2.32-2.43 (4H, m), 2.53-2.58 (2H, m), 2.71 (1H, dd,  $J$  = 11.2, 17.6 Hz), 2.86 (1H, dd,  $J$  = 11.2, 17.6 Hz), 3.11-3.25 (2H, m), 3.51 (1H, dd,  $J$  = 9.2, 17.2 Hz), 3.77 (1H, dd,  $J$  = 9.2, 17.2 Hz), 5.53 (2H, s), 6.67-6.71 (4H, m), 7.06-7.14 (6H, m);  $^{13}\text{C}$ -NMR (100 MHz,  $\text{CDCl}_3$ )  $\delta$  27.7 (2C,  $\text{CH}_2$ ), 33.6 (1C,  $\text{CH}_2$ ), 34.5 (1C,  $\text{CH}_2$ ), 36.7 (1C,  $\text{CH}_2$ ), 36.7 (1C,  $\text{CH}_2$ ), 37.7 (1C, CH), 37.9 (1C, CH), 104.1 (1C, CH), 104.1 (1C, CH), 120.4 (1C, C), 120.4 (1C, C), 127.2 (1C, CH), 127.2 (1C, CH), 127.9 (4C, CH), 129.2 (4C, CH), 133.1 (1C, C), 133.1 (1C, C), 162.6 (1C, C), 163.1 (1C, C), 178.1 (1C, C), 178.2 (1C, C), 195.4 (0.5C, C), 195.5 (0.5C, C), 198.3 (1C, C), 198.3 (1C, C); HRMS- $\text{EI}$ :  $m/z$  [ $\text{M}^+$ ] calcd for  $\text{C}_{31}\text{H}_{26}\text{O}_5$ : 478.1780; found: 478.1778; IR (KBr): 2951, 1660, 1617, 1148, 1125, 815  $\text{cm}^{-1}$ .

Diastereomeric mixture, ratio = 1.5:1. Pale yellow needles, mp. 150-152°C ;  $^1\text{H}$ - NMR (400 MHz,  $\text{CDCl}_3$ )  $\delta$  1.77-1.87 (2H, m), 2.33-2.42 (4H, m), 2.52-2.57 (2H, m), 2.67 (0.8H, dd,  $J$  = 11.2, 17.6 Hz), 2.82 (1.2H, dd,  $J$  = 11.2, 17.6 Hz), 3.13-3.19 (2H, m), 3.46 (1.2H, dd,  $J$  = 9.2, 17.2 Hz), 3.72 (0.8H, dd,  $J$  = 9.2, 17.2 Hz), 3.76-3.77 (6H, m), 5.54 (2H, s), 6.64-6.66 (8H, m);  $^{13}\text{C}$ -NMR (100 MHz,  $\text{CDCl}_3$ )  $\delta$  27.7 (2C,  $\text{CH}_2$ ), 33.5 (0.8C,  $\text{CH}_2$ ), 34.4 (1.2C,  $\text{CH}_2$ ), 36.7 (2C,  $\text{CH}_2$ ), 37.8 (0.8C, CH), 38.0 (1.2C, CH), 55.3 (2C,  $\text{CH}_3$ ), 104.0 (0.8C, CH), 104.1 (1.2C, CH), 113.4 (4C, CH), 120.0 (1.2C, C), 120.1 (0.8C, C), 125.5 (0.8C, CH), 125.5 (1.2C, CH), 130.3 (4C, CH), 158.8 (1.2C, C), 158.8 (0.8C, C), 161.9 (0.8C, C), 162.4 (1.2C, C), 178.3 (0.8C, C), 178.3 (1.2C, C), 195.9 (0.6C, C), 196.0 (0.4C, C), 198.3 (1.2C, C), 198.4 (0.8C, C); HRMS- $\text{EI}$ :  $m/z$  [ $\text{M}^+$ ] calcd for  $\text{C}_{33}\text{H}_{30}\text{O}_7$ : 538.1992; found: 538.1991; IR (KBr): 2953, 1656, 1614, 1513, 1149, 1123, 814  $\text{cm}^{-1}$ .

Diastereomeric mixture, ratio = 1.5:1. Pale yellow powder, mp. 215-217°C ;  $^1\text{H}$ - NMR (400 MHz,  $\text{CDCl}_3$ )  $\delta$  1.81-1.90 (2H, m), 2.33-2.63 (6H, m), 2.77 (0.8H, dd,  $J$  = 11.0, 17.6 Hz), 2.93 (1.2H, dd,  $J$  = 11.0, 17.6 Hz), 3.19-3.24 (2H, m), 3.57 (1.2H, dd,  $J$  = 9.2, 17.6), 3.86 (0.8H, dd,  $J$  = 9.2, 17.6 Hz), 5.53-5.55 (2H, m), 6.76-6.79 (4H, m), 7.26-7.31 (4H, m);  $^{13}\text{C}$ -NMR (100 MHz,  $\text{CDCl}_3$ )  $\delta$  27.7 (2C,  $\text{CH}_2$ ), 33.9 (0.8C,  $\text{CH}_2$ ), 34.9 (1.2C,  $\text{CH}_2$ ), 36.7 (1.2C,  $\text{CH}_2$ ), 36.7 (0.8C,  $\text{CH}_2$ ), 37.5 (0.8C, CH), 37.7 (1.2C, CH), 104.6 (0.8C, CH), 104.6 (1.2C, CH), 118.7 (1.2C, C), 118.7 (0.8C, C), 123.9 (2C, C,  $^1J_{\text{C-F}}$  = 270.7 Hz), 124.8 (4C, C,  $^3J_{\text{C-F}}$  = 4.1 Hz), 129.4 (1.2C, C,  $^2J_{\text{C-F}}$  = 32.6 Hz), 129.4 (0.8C, C,  $^2J_{\text{C-F}}$  = 32.6 Hz), 129.7 (1.6C, CH), 129.7 (2.4C, CH), 137.0 (2C, C), 165.0 (0.8C, C), 165.5 (1.2C, C), 177.5 (0.8C, C), 177.6 (1.2C, C), 193.2 (0.6C, C), 193.3 (0.4C, C), 198.0 (0.8C, C), 198.0 (1.2C, C); HRMS- $\text{EI}$ :  $m/z$  [ $\text{M}^+$ ] calcd for  $\text{C}_{33}\text{H}_{24}\text{O}_5\text{F}_6$ : 614.1528; found: 614.1527; IR (KBr): 3006, 1656, 1609, 1326, 1122, 817, 754  $\text{cm}^{-1}$ .

Diastereomeric mixture, ratio = 1.2:1. Pale yellow powder, mp. 233-235°C ; <sup>1</sup>H- NMR (400 MHz, CDCl<sub>3</sub>) δ 1.78-1.88 (2H, m), 2.32-2.58 (6H, m), 2.71 (0.9H, dd, *J* = 11.2, 17.6 Hz), 2.86 (1.1H, dd, *J* = 11.2, 17.6 Hz), 3.15-3.21 (2H, m), 3.49 (1.1H, dd, *J* = 9.0, 17.2 Hz), 3.76 (0.9H, dd, *J* = 9.0, 17.2 Hz), 5.53-5.55 (2H, m), 6.62-6.66 (4H, m), 7.07-7.10 (4H, m); <sup>13</sup>C-NMR (100 MHz, CDCl<sub>3</sub>) δ 27.7 (2C, CH<sub>2</sub>), 33.7 (0.9C, CH<sub>2</sub>), 34.6 (1.1C, CH<sub>2</sub>), 36.7 (2C, CH<sub>2</sub>), 37.6 (0.9C, CH), 37.8 (1.1C, CH), 104.3 (0.9C, CH), 104.4 (1.1C, CH), 119.0 (1.1C, CH), 119.0 (0.9C, C), 128.2 (4C, CH), 130.5 (1.8C, CH), 130.6 (2.2C, CH), 131.6 (0.9C, C), 131.6 (1.1C, C), 133.4 (1.1C, C), 133.5 (0.9C, C), 163.6 (0.9C, C), 164.1 (1.1C, C), 177.7 (0.9C, C), 177.8 (1.1C, C), 194.2 (0.55C, C), 194.3 (0.45C, C), 198.1 (0.9C, C), 198.1 (1.1C, C); HRMS-EI:*m/z* [*M*<sup>+</sup>] calcd for C<sub>31</sub>H<sub>24</sub>Cl<sub>2</sub>O<sub>5</sub>: 546.1001; found: 546.0996; IR (KBr): 2952, 1656, 1614, 1149, 1123, 813 cm<sup>-1</sup>.

Diastereomeric mixture, ratio = 1.5:1. Yellow powder, mp. 204-206°C ; <sup>1</sup>H- NMR (400 MHz, CDCl<sub>3</sub>) δ 1.00, 1.01 (total 6H, s each, ratio = 1.5 : 1), 1.21, 1.21 (total 6H, s each, ratio = 1.5 : 1), 2.31, 2.32 (total 4H, s each, ratio = 1.5 : 1), 2.83-3.84 (6H, m), 5.53, 5.54 (total 2H, s each, ratio = 1.5 : 1), 6.66-6.71 (4H, m), 7.03-7.27 (6H, m); <sup>13</sup>C-NMR (100 MHz, CDCl<sub>3</sub>) δ 19.8 (1.2C, CH<sub>3</sub>), 19.8 (0.8C, CH<sub>3</sub>), 28.1 (1.2C, CH<sub>2</sub>), 29.1 (0.8C, CH<sub>2</sub>), 29.2 (2C, CH<sub>3</sub>), 35.7 (1.2C, CH), 35.7 (0.8C, CH), 47.9 (0.8C, CH), 48.1 (1.2H, CH), 52.4 (0.8H, CH<sub>2</sub>), 52.5 (1.2C, CH<sub>2</sub>), 103.3 (0.8C, CH), 103.4 (1.2C, CH), 120.4 (1.2C, C), 120.4 (0.8C, C), 127.1 (1.2C, CH), 127.2 (0.8C, CH), 127.8 (4C, CH), 129.2 (4C, CH), 133.1 (0.8C, C), 133.1 (1.2C, C), 162.7 (0.8C, C), 163.4 (1.2C, C), 176.1 (0.8C, C), 176.1 (1.2C, C), 195.7 (0.6C, C), 195.8 (0.4C, C), 198.0 (2C, C); HRMS-EI:*m/z* [*M*<sup>+</sup>] calcd for C<sub>35</sub>H<sub>34</sub>O<sub>5</sub>: 534.2406; found: 534.2411; IR (KBr): 2962, 1655, 1611, 1361, 1149, 818 cm<sup>-1</sup>.

### CCC-coupling reaction of **5**

A 50 mL two-neck round-bottom flask containing a magnetic stirring bar, Pd(tfa)<sub>2</sub> (0.015 mmol), ligand (0.023 mmol), *p*-benzoquinone (0.6 mmol) and MeOH / CH<sub>2</sub>Cl<sub>2</sub> = 1 / 1 (5 mL) was fitted with a rubber septum and a three-way stopcock connected to a balloon filled with carbon monoxide. The apparatus was purged with carbon monoxide by pump-filling via the three-way stopcock. A MeOH / CH<sub>2</sub>Cl<sub>2</sub> = 1 / 1 solution (1 mL) of substrate **5** (0.3 mmol) was added to the stirred solution via syringe at an appropriate temperature. The remaining substrate was washed in MeOH / CH<sub>2</sub>Cl<sub>2</sub> = 1 / 1 (1 mL) twice. After stirring for the period of time at the appropriate temperature, the mixture was diluted with CH<sub>2</sub>Cl<sub>2</sub> (50 mL) and washed with 3% NaOH (40 mL). The aqueous layer was extracted with CH<sub>2</sub>Cl<sub>2</sub> (50 mL) twice and the combined organic layers were dried over MgSO<sub>4</sub> and concentrated *in vacuo*. The crude product was purified by flash chromatography on silica gel. The fraction eluted with hexane / ethyl acetate (3/1- 0/1) afforded dimeric ketone **7** and **8**.



Pale yellow powder, mp. 180-182 °C;  $^1\text{H}$ -NMR (400 MHz,  $\text{CDCl}_3$ )  $\delta$  2.97-3.01 (4H, m), 3.25-3.29 (4H, m), 6.24 (4H, s), 7.43-7.55 (6H, m), 7.92 (4H, d,  $J = 7.2$  Hz);  $^{13}\text{C}$ -NMR (100 MHz,  $\text{CDCl}_3$ )  $\delta$  26.6 (2C,  $\text{CH}_2$ ), 29.1 (2C,  $\text{CH}_2$ ), 98.2 (2C, CH), 105.4 (2C, CH), 128.0 (4C, CH), 128.5 (4C, CH), 132.4 (2C, CH), 138.8 (2C, C), 166.8 (2C, C), 172.6 (2C, C), 187.6 (2C, C), 189.2 (1C, C); HRMS-ESI:  $m/z$  [ $\text{M}^+$ ] calcd for  $\text{C}_{27}\text{H}_{22}\text{O}_5$ : 426.1467; found: 426.1467; IR (KBr): 3056, 1639, 1598, 1287, 1216, 1066, 941  $\text{cm}^{-1}$ .

Pale yellow powder, mp. 122-124°C;  $^1\text{H}$ -NMR (400 MHz,  $\text{CDCl}_3$ )  $\delta$  3.27-3.32 (2H, m), 3.38-3.43 (2H, m), 3.73 (3H, s), 5.67-5.68 (1H, m), 6.80-6.81 (1H, m), 7.45-7.57 (3H, m), 7.91-7.93 (2H, m);  $^{13}\text{C}$ -NMR (100 MHz,  $\text{CDCl}_3$ )  $\delta$  27.5 ( $\text{CH}_2$ ), 28.5 ( $\text{CH}_2$ ), 51.3 ( $\text{CH}_3$ ), 94.9 (CH), 98.8 (CH), 127.8 (CH), 128.6 (CH), 132.5 (CH), 138.9 (C), 167.5 (C), 172.2 (C), 174.0 (C), 190.1 (C); HRMS-ESI:  $m/z$  [ $\text{M}^+$ ] calcd for  $\text{C}_{15}\text{H}_{14}\text{O}_4$ : 258.0892; found: 258.0889; IR (KBr): 2952, 1713, 1649, 1598, 1159, 1122, 703  $\text{cm}^{-1}$ .

Diastereomeric mixture, ratio = 1.5:1. Pale yellow powder, mp. 183-184°C;  $^1\text{H}$ -NMR (400 MHz,  $\text{CDCl}_3$ )  $\delta$  2.09-2.22 (10H, m), 2.71-2.85 (4H, m), 2.93-2.97 (2H, m), 5.60 (2H, s);  $^{13}\text{C}$ -NMR (100 MHz,  $\text{CDCl}_3$ )  $\delta$  18.0 (1.2C,  $\text{CH}_3$ ), 18.1 (0.8C,  $\text{CH}_3$ ), 27.3 (1.2C,  $\text{CH}_2$ ), 27.4 (0.8C,  $\text{CH}_2$ ), 32.7 (1.2C,  $\text{CH}_3$ ), 32.7 (0.8C, CH), 41.3 (0.8C,  $\text{CH}_2$ ), 41.3 (1.2C,  $\text{CH}_2$ ), 109.0 (0.8C, CH), 109.0 (1.2C, CH), 114.9 (0.8C, C), 115.0 (1.2C, C), 155.4 (1.2C, C), 156.1 (0.8C, C), 182.8 (1.2C, C), 182.9 (0.8C, C), 194.7 (0.4C, C), 195.1 (0.6C, C), 203.1 (0.8C, C), 203.1 (1.2C, C); HRMS-ESI:  $m/z$  [ $\text{M}^+$ ] calcd for  $\text{C}_{19}\text{H}_{18}\text{O}_5$ : 326.1154; found: 326.1152; IR (KBr): 3101, 2913, 1704, 1618, 1359, 1222, 1156, 961, 839  $\text{cm}^{-1}$ .

Diastereomeric mixture, ratio = 1.5:1. Pale yellow powder, mp. 116-118°C;  $^1\text{H}$ -NMR (400 MHz,  $\text{CDCl}_3$ )  $\delta$  1.19 (3H, t,  $J = 7.6$  Hz), 1.20 (3H, t,  $J = 7.6$  Hz), 2.13-2.21 (4H, m), 2.47-2.59 (4H, m), 2.67-2.85 (4H, m), 2.92-2.95 (2H, m), 5.61-5.62 (2H, m);  $^{13}\text{C}$ -NMR (100 MHz,  $\text{CDCl}_3$ )  $\delta$  11.9 (1.2C,  $\text{CH}_3$ ), 11.9 (0.8C,  $\text{CH}_3$ ), 24.9 (1.2C,  $\text{CH}_2$ ), 24.9 (0.8C,  $\text{CH}_2$ ), 27.5 (0.8C,  $\text{CH}_2$ ), 27.5 (1.2C,  $\text{CH}_2$ ), 32.7 (1.2C,  $\text{CH}_3$ ), 32.8 (0.8C, CH), 41.3 (0.8C,  $\text{CH}_2$ ), 41.3 (1.2C,  $\text{CH}_2$ ), 108.9 (0.8C, CH), 109.0 (1.2C, CH), 114.1 (0.8C, C), 114.2 (1.2C, C), 159.8 (1.2C, C), 160.5 (0.8C, C), 183.1 (1.2C, C), 183.2 (0.8C, C), 194.7 (0.4C, C), 195.1 (0.6C, C), 203.2 (0.8C, C), 203.2 (1.2C, C); HRMS-ESI:  $m/z$  [ $\text{M}^+$ ] calcd for  $\text{C}_{21}\text{H}_{22}\text{O}_5$ : 354.1467; found: 354.1461; IR (KBr): 2976, 2940, 1703, 1620, 1360, 1217, 1156, 835  $\text{cm}^{-1}$ .

Diastereomeric mixture, ratio = 1.5:1. Yellow oil;  $^1\text{H}$ -NMR (400 MHz,  $\text{CDCl}_3$ )  $\delta$  0.88 (6H, t,  $J$  = 6.8 Hz), 1.23-1.33 (12H, m), 1.56-1.61 (4H, m), 2.09-2.21 (4H, m), 2.47-2.56 (4H, s), 2.64-2.93 (6H, m), 5.60 (2H, s);  $^{13}\text{C}$ -NMR (100 MHz,  $\text{CDCl}_3$ )  $\delta$  14.0 (2C,  $\text{CH}_3$ ), 22.5 (1.2C,  $\text{CH}_2$ ), 22.5 (0.8C,  $\text{CH}_2$ ), 27.2 (1.2C,  $\text{CH}_2$ ), 27.3 (0.8C,  $\text{CH}_3$ ), 27.6 (0.8C,  $\text{CH}_2$ ), 27.6 (1.2C,  $\text{CH}_2$ ), 28.9 (1.2C,  $\text{CH}_2$ ), 29.0 (0.8C,  $\text{CH}_2$ ), 31.4 (0.8C,  $\text{CH}_2$ ), 31.4 (0.8C,  $\text{CH}_2$ ), 31.4 (1.2C,  $\text{CH}_2$ ), 31.5 (1.2C,  $\text{CH}_2$ ), 32.8 (1.2C, CH), 32.8 (0.8C, CH), 108.9 (0.8C, CH), 108.9 (1.2C, CH), 114.7 (0.8C, C), 114.7 (1.2C, C), 158.9 (1.2C, C), 159.5 (0.8C, C), 183.1 (1.2C, C), 183.2 (0.8C, C), 194.8 (0.8C, C), 195.1 (1.2C, C), 203.2 (0.8C, C), 203.2 (1.2C, C); HRMS- $\text{EI}$ :  $m/z$  [ $\text{M}^+$ ] calcd for  $\text{C}_{29}\text{H}_{38}\text{O}_5$ : 466.2719; found: 466.2717; IR (KBr): 2955, 2929, 1708, 1657, 1615, 1362, 1216, 1158, 836  $\text{cm}^{-1}$ .

Yellow oil,  $^1\text{H}$ -NMR (400 MHz,  $\text{CDCl}_3$ )  $\delta$  0.89 (3H, t,  $J$  = 6.8 Hz), 1.29-1.39 (6H, m), 1.58-1.65 (2H, m), 2.04-2.11 (1H, m), 2.18 (1H, dd,  $J$  = 17.6, 3.2 Hz), 2.75-2.87 (4H, m), 2.99 (1H, dd,  $J$  = 16.4, 6.8 Hz), 3.76 (3H, s), 5.58 (1H, d,  $J$  = 1.6 Hz);  $^{13}\text{C}$ -NMR (100 MHz,  $\text{CDCl}_3$ )  $\delta$  14.1 ( $\text{CH}_3$ ), 22.5 ( $\text{CH}_2$ ), 26.5 ( $\text{CH}_2$ ), 27.4 ( $\text{CH}_2$ ), 29.0 ( $\text{CH}_2$ ), 31.5 ( $\text{CH}_2$ ), 31.9 ( $\text{CH}_2$ ), 32.5 (CH), 41.4 ( $\text{CH}_2$ ), 51.8 ( $\text{CH}_3$ ), 105.9 (C), 108.6 (CH), 164.0 (C), 166.9 (C), 183.6 (C), 203.7 (C); HRMS- $\text{EI}$ :  $m/z$  [ $\text{M}^+$ ] calcd for  $\text{C}_{16}\text{H}_{22}\text{O}_4$ : 278.1518; found: 278.1519; IR (KBr): 2954, 2930, 1714, 1624, 1362, 1216, 1160  $\text{cm}^{-1}$ .

Pale yellow powder, mp. 125-127°C  $^1\text{H}$ -NMR (400 MHz,  $\text{CDCl}_3$ )  $\delta$  2.23-2.32 (2H, m), 2.87 (1H, dd,  $J$  = 17.8, 6.8 Hz), 3.02-3.10 (1H, m), 3.14 (1H, dd,  $J$  = 16.0, 7.2 Hz), 3.56 (3H, s), 5.65 (1H, d,  $J$  = 1.6 Hz), 7.42-7.46 (5H, m);  $^{13}\text{C}$ -NMR (100 MHz,  $\text{CDCl}_3$ )  $\delta$  27.4 ( $\text{CH}_2$ ), 32.3 (CH), 41.5 ( $\text{CH}_2$ ), 51.9 ( $\text{CH}_3$ ), 107.9 (C), 109.3 (CH), 128.1 (CH), 128.6 (CH), 130.1 (CH), 133.5 (C), 157.9 (C), 167.2 (C), 183.2 (C), 203.4 (C); HRMS- $\text{EI}$ :  $m/z$  [ $\text{M}^+$ ] calcd for  $\text{C}_{16}\text{H}_{14}\text{O}_4$ : 270.0892; found: 270.0888; IR (KBr): 2986, 2945, 1701, 1626, 1226, 1165, 1054, 768  $\text{cm}^{-1}$ .

## References

- 1 M. Gulías, J. R. Rodríguez, L. Castedo, J. L. Mascareñas, *Org. Lett.* **2003**, 5, 1975.
- 2 Y. Li, Z. Yu, *J. Org. Chem.* **2009**, 74, 8904.

6a-1H

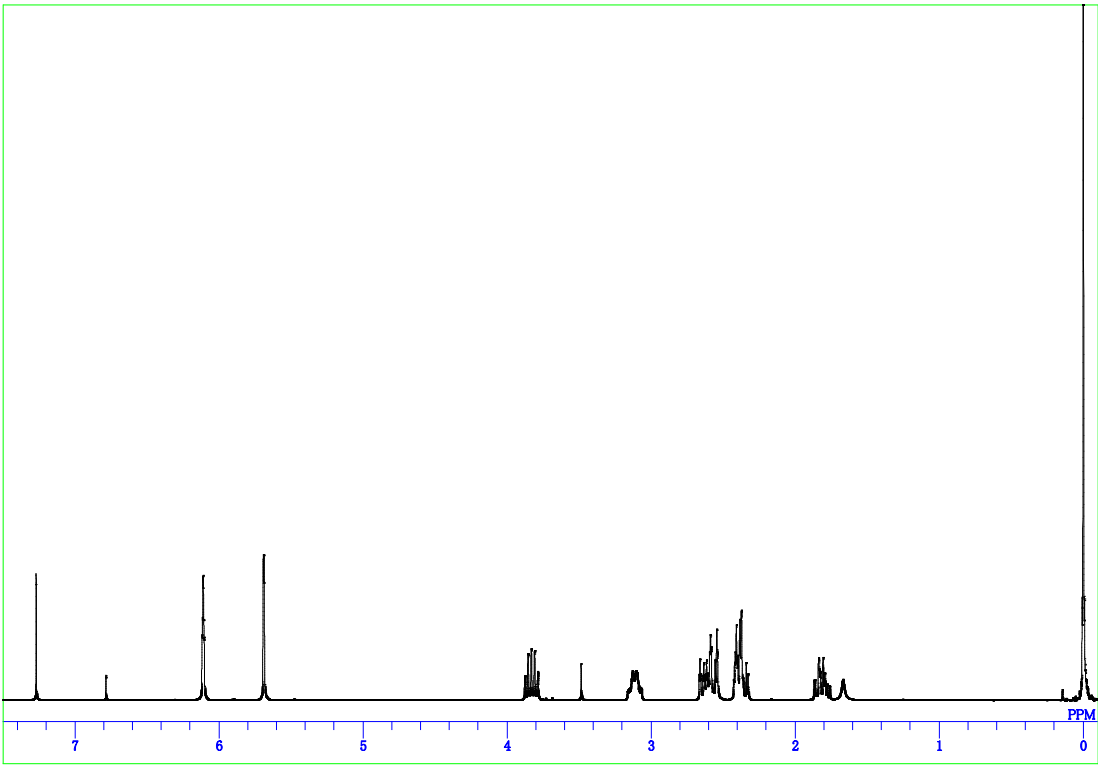

6a-13C

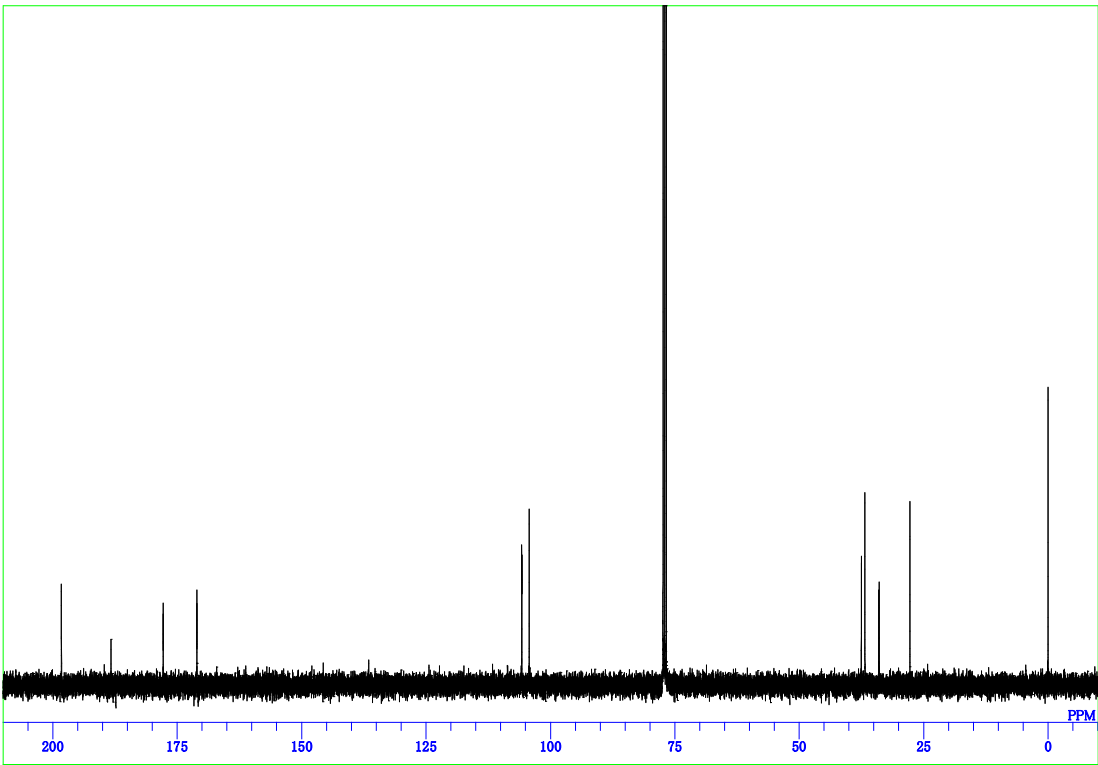

6b-1H

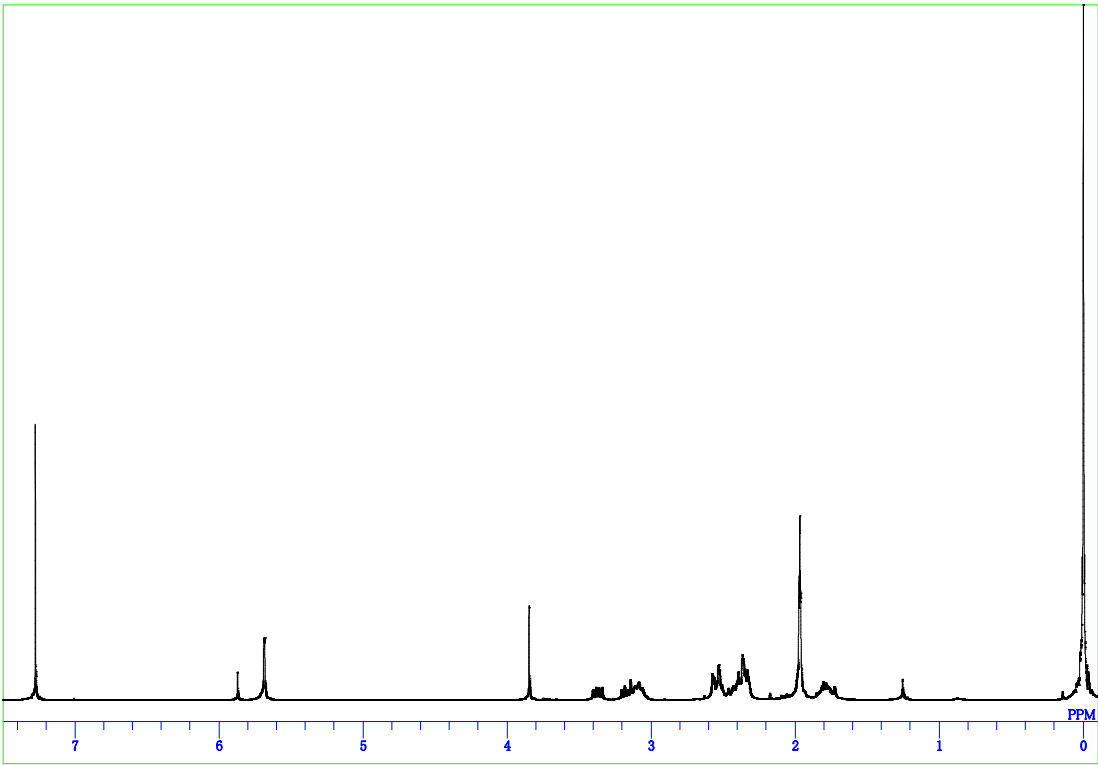

6b-13C

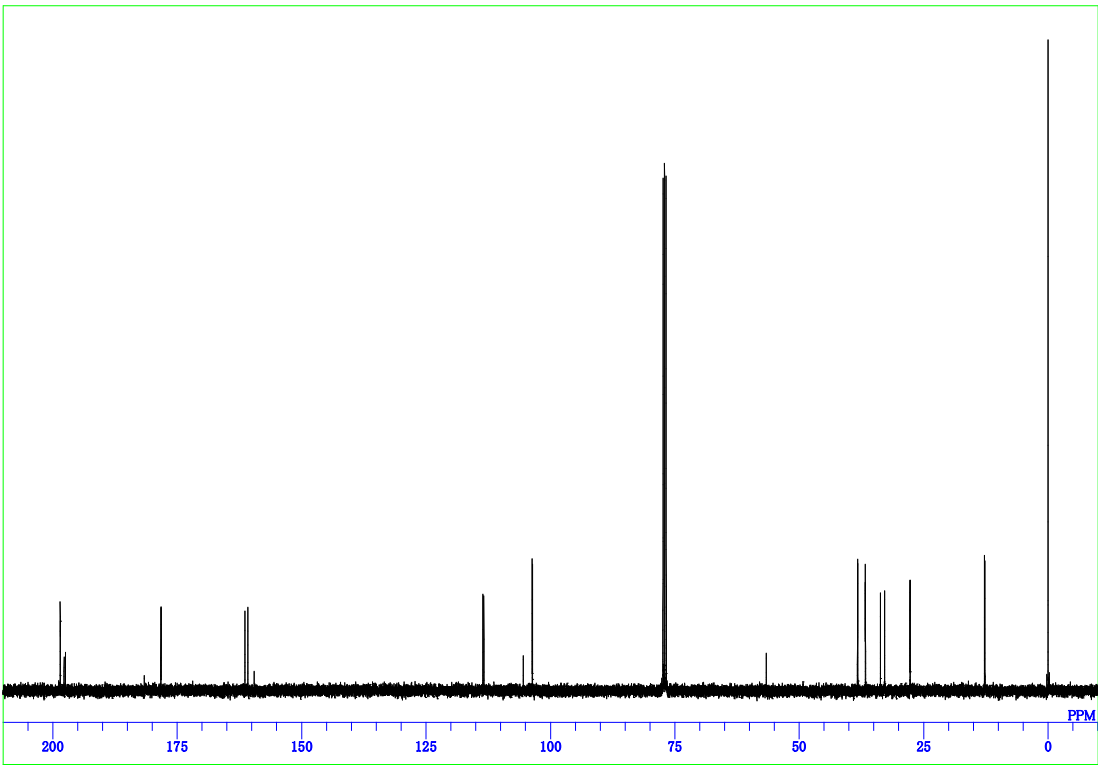

6c-1H

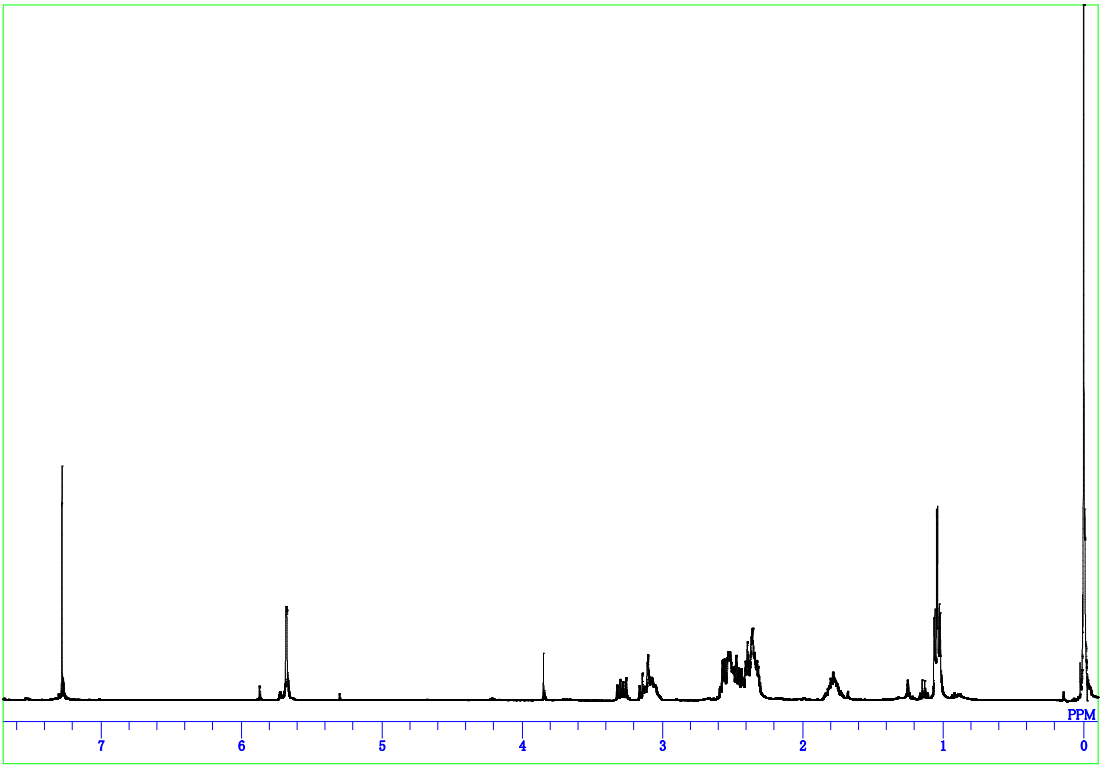

6c-BCM

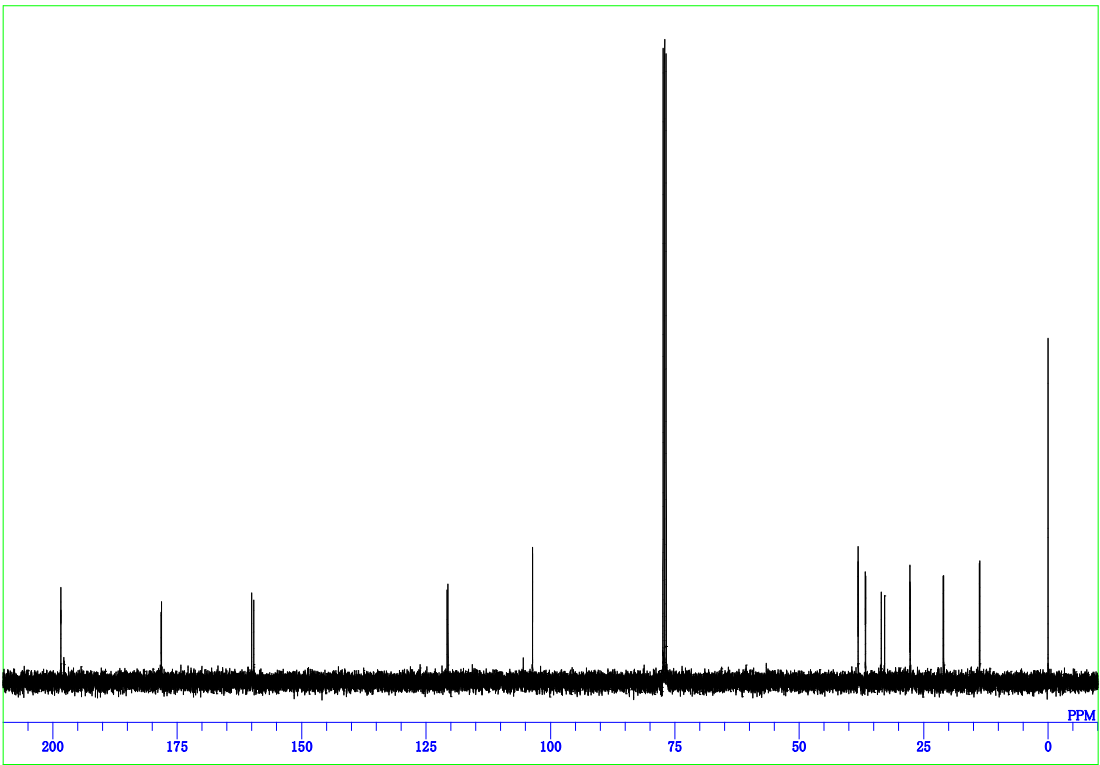

6d-1H

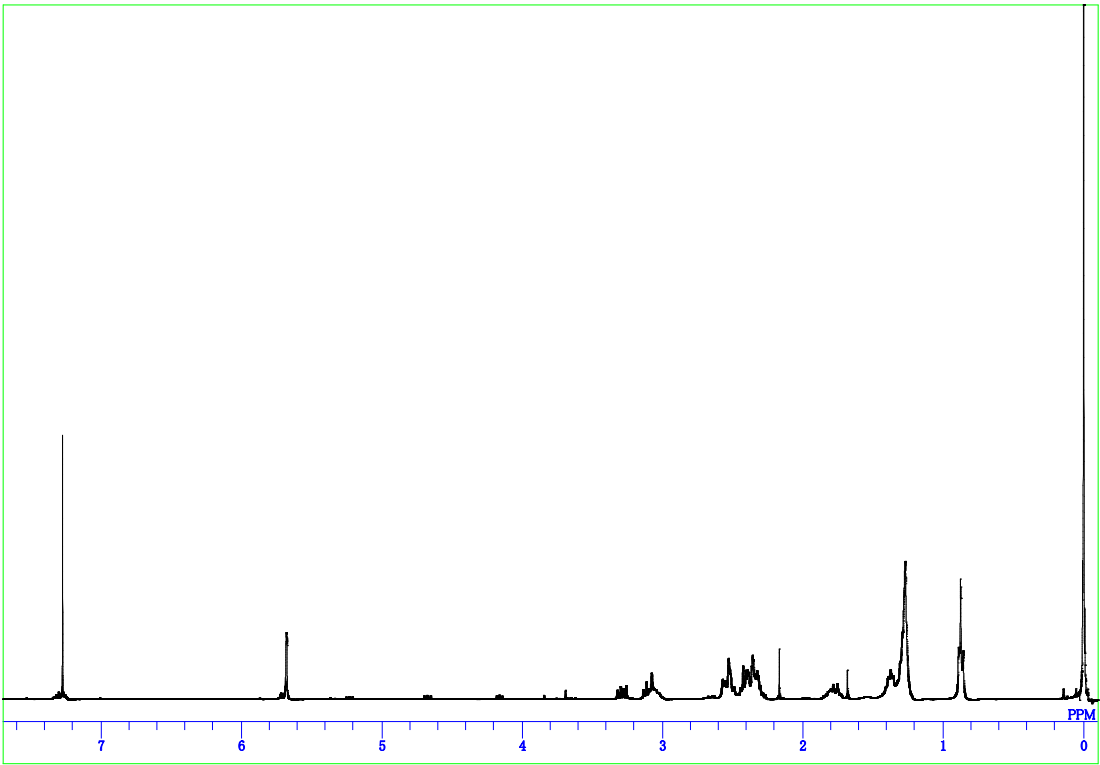

6d-13C

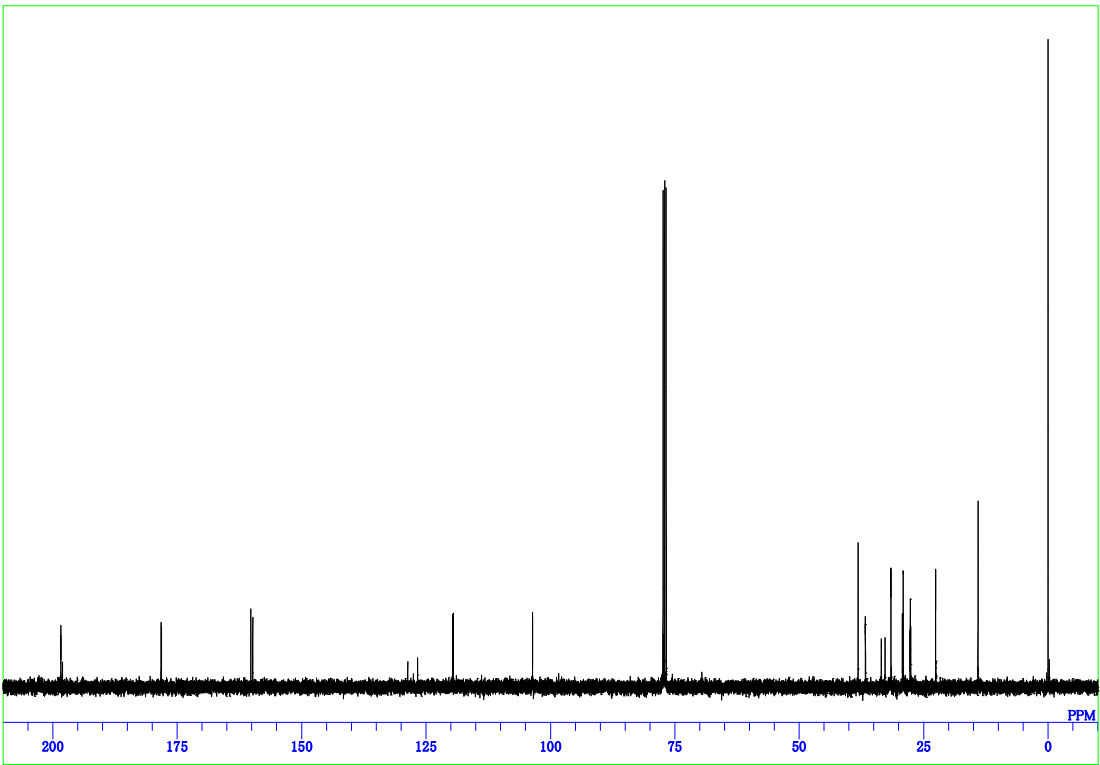

6e-1H

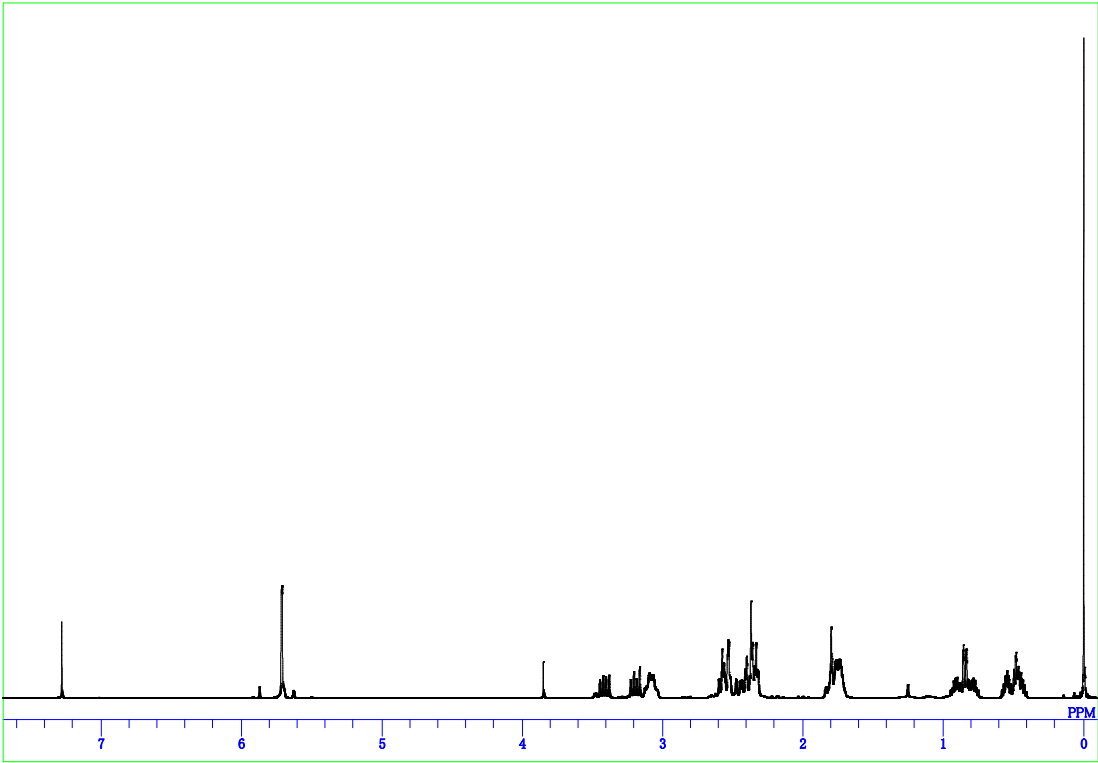

6e-BCM

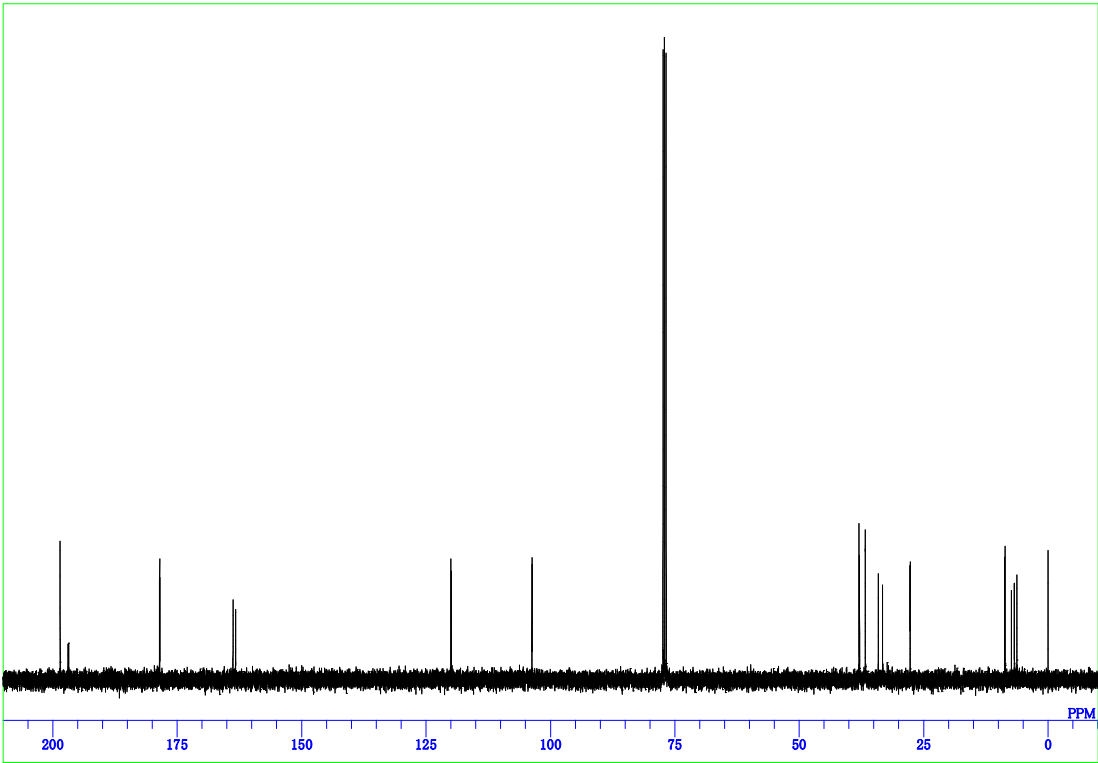

6f-1H

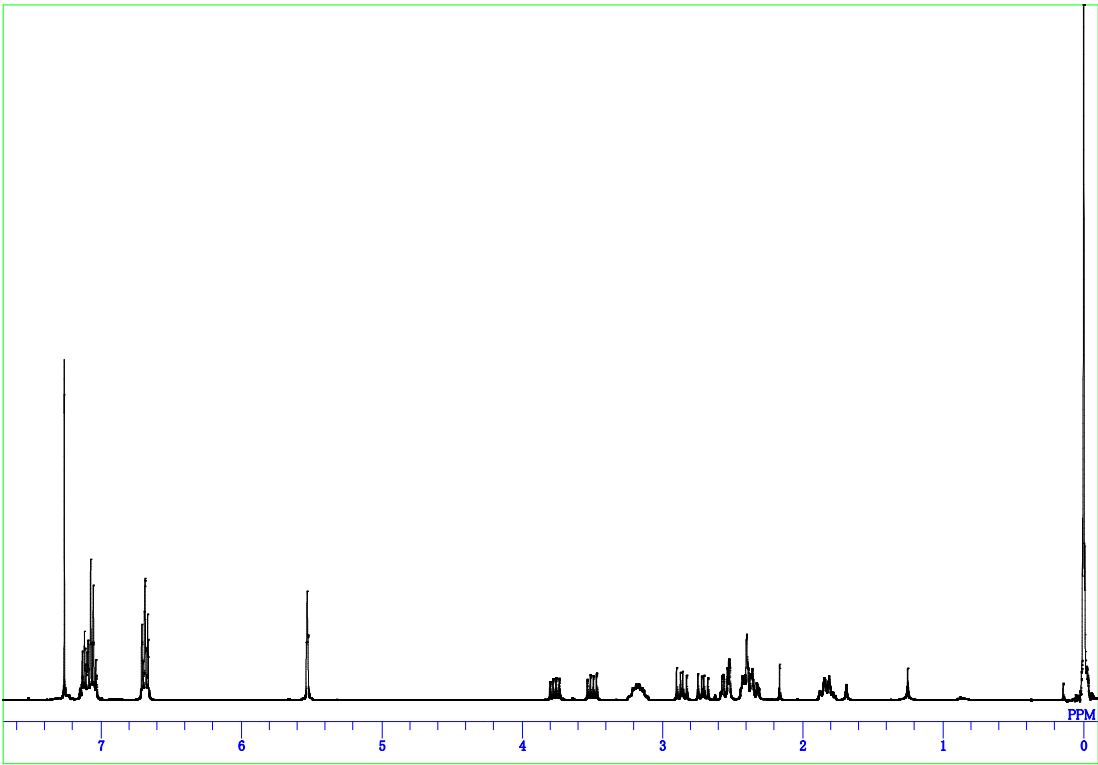

6f-BCM

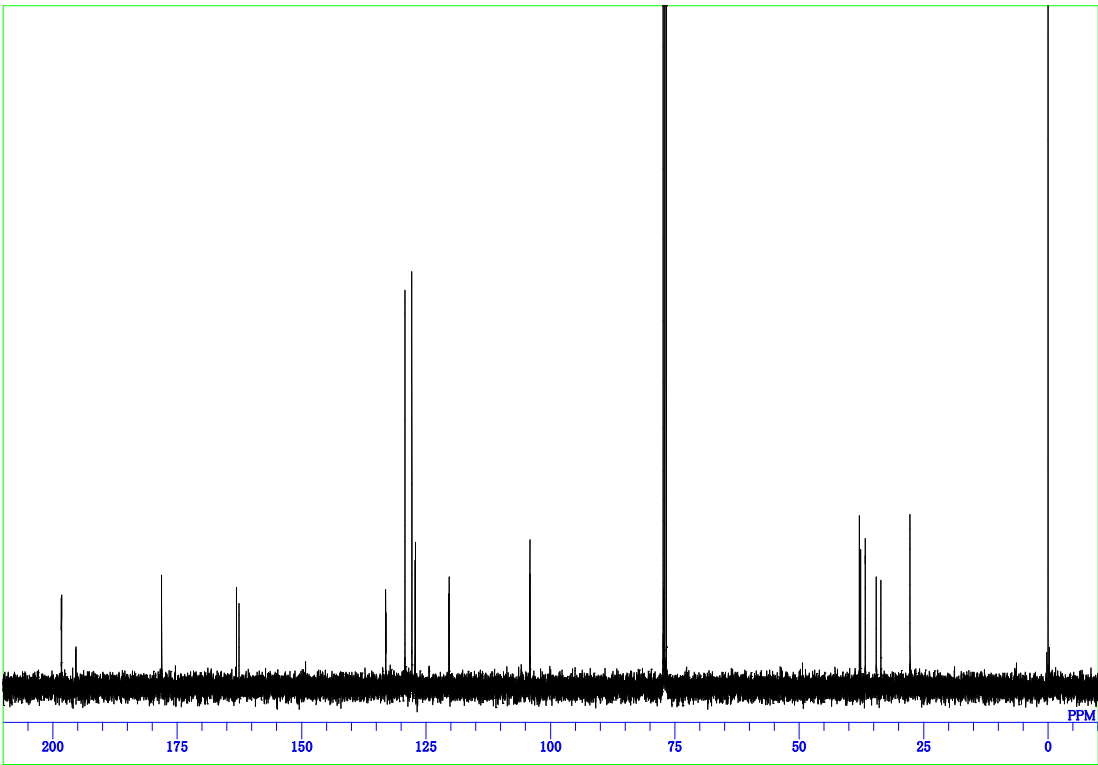



6g-1H

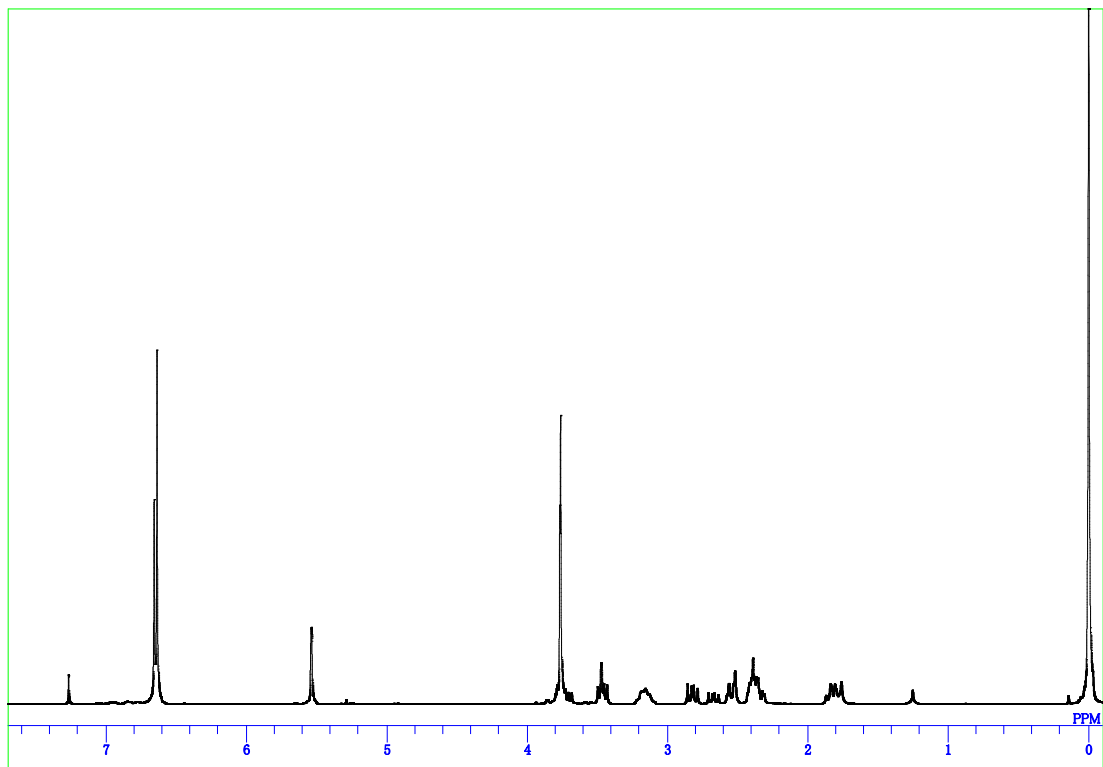

6g-BCM

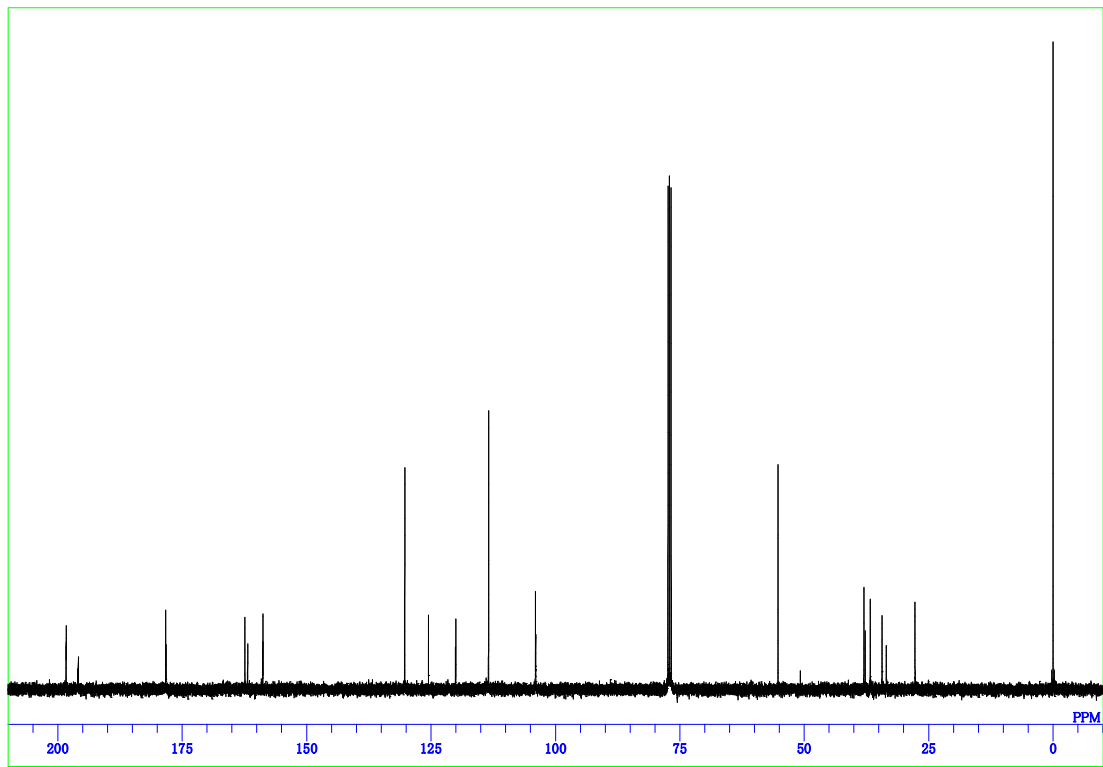

6h-1H

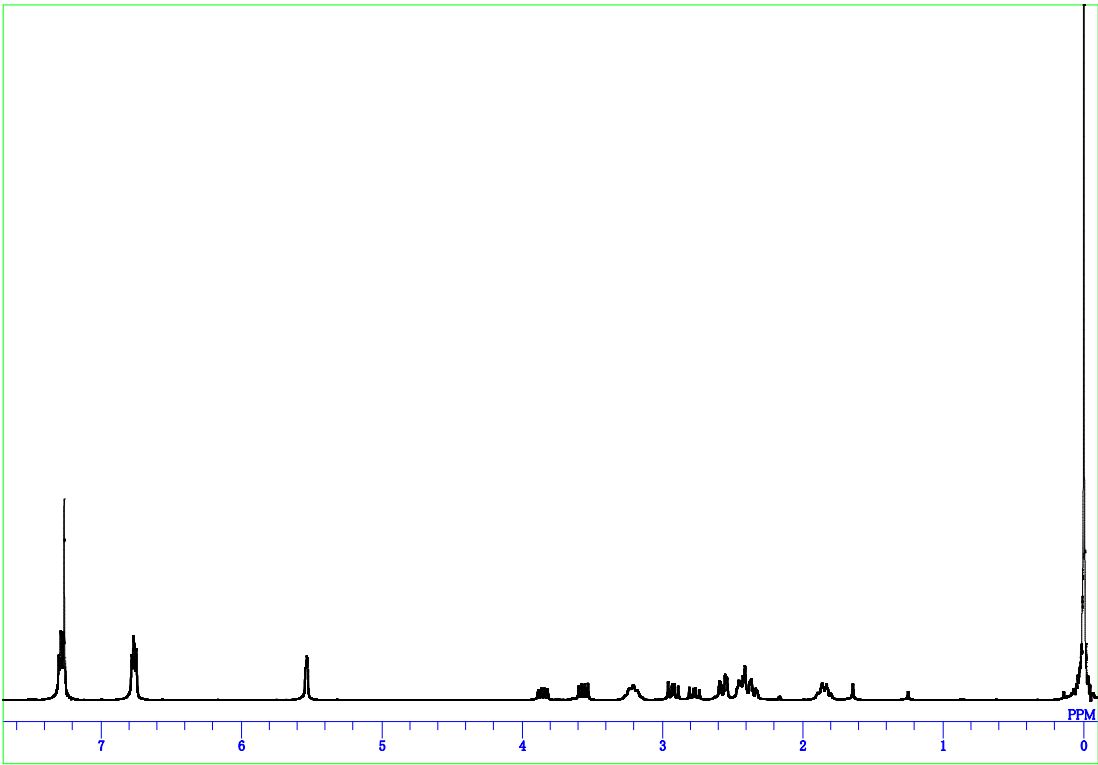

6h-13C

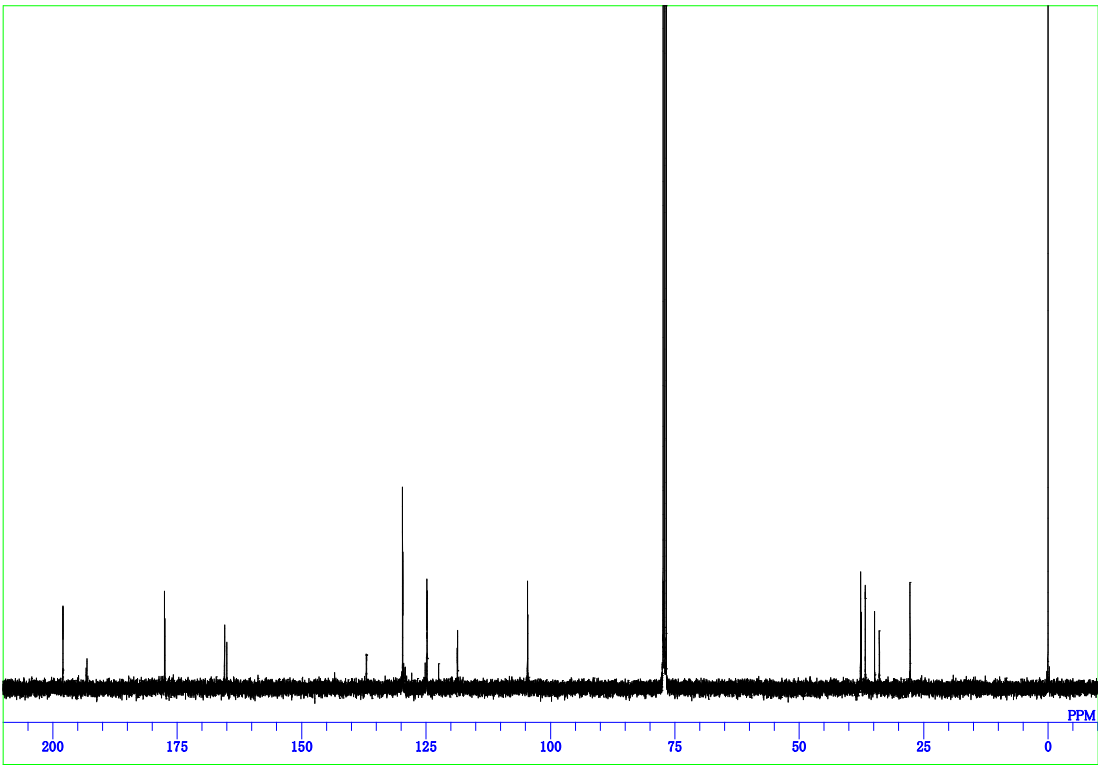

6i-1H

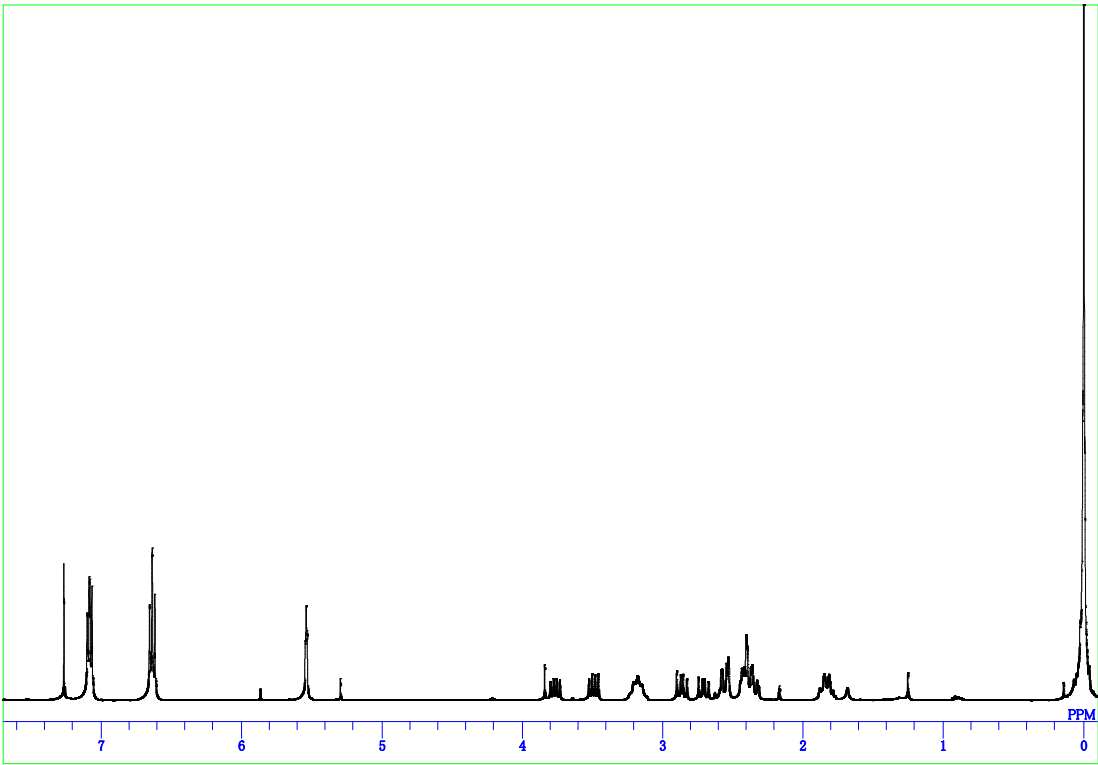

6i-BCM

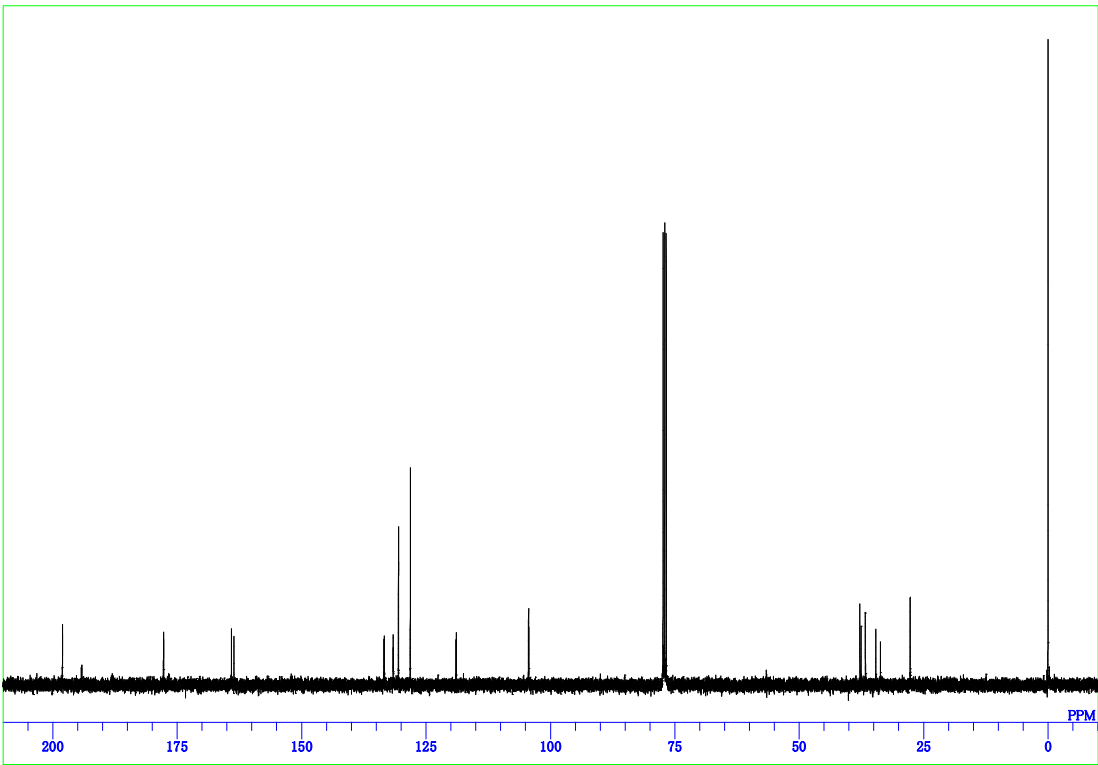

6j-1H

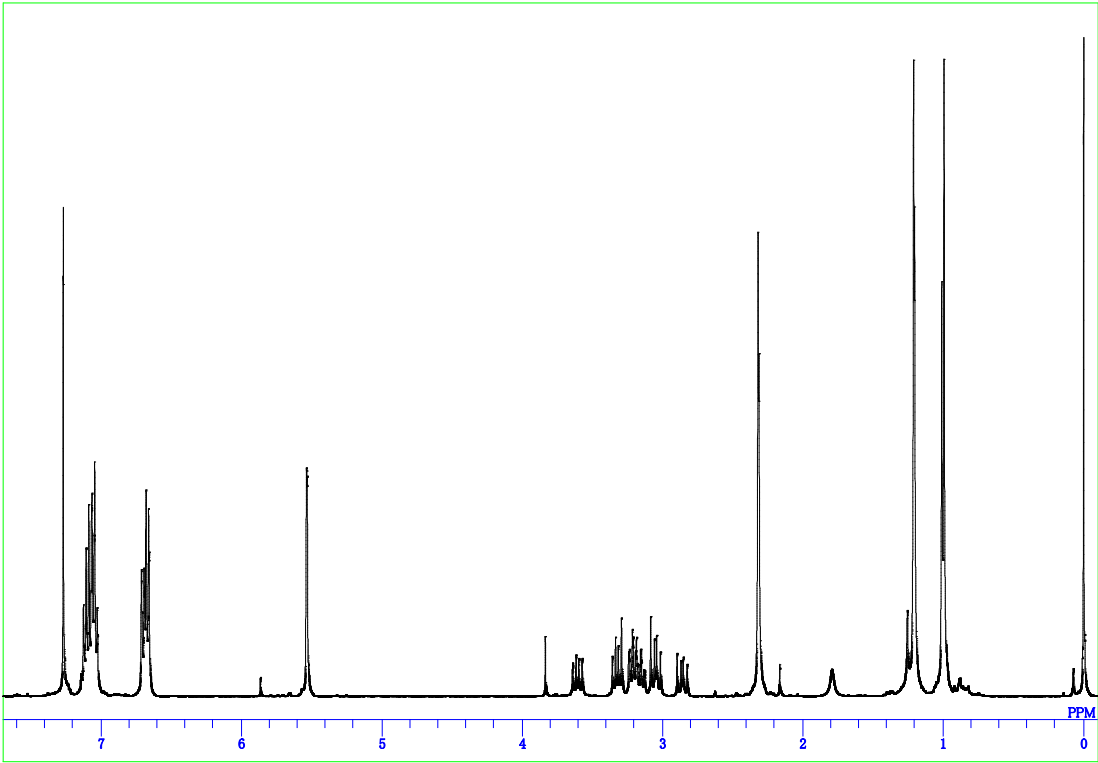

6j-BCM

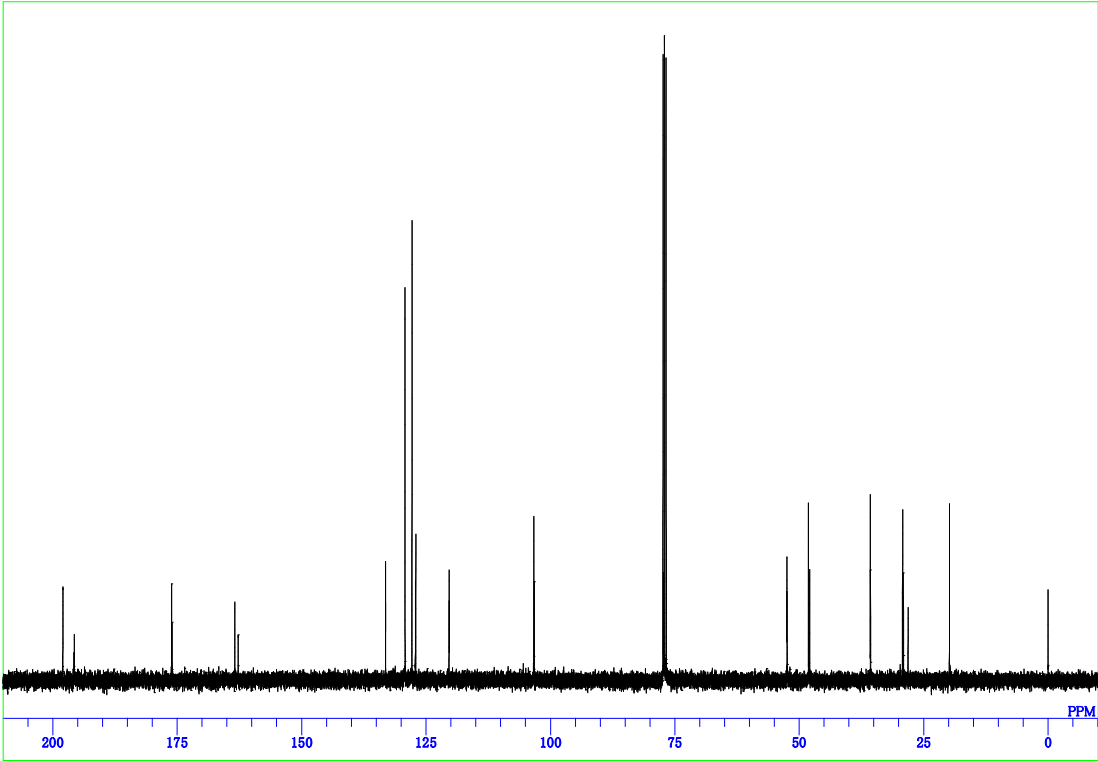

7-1H

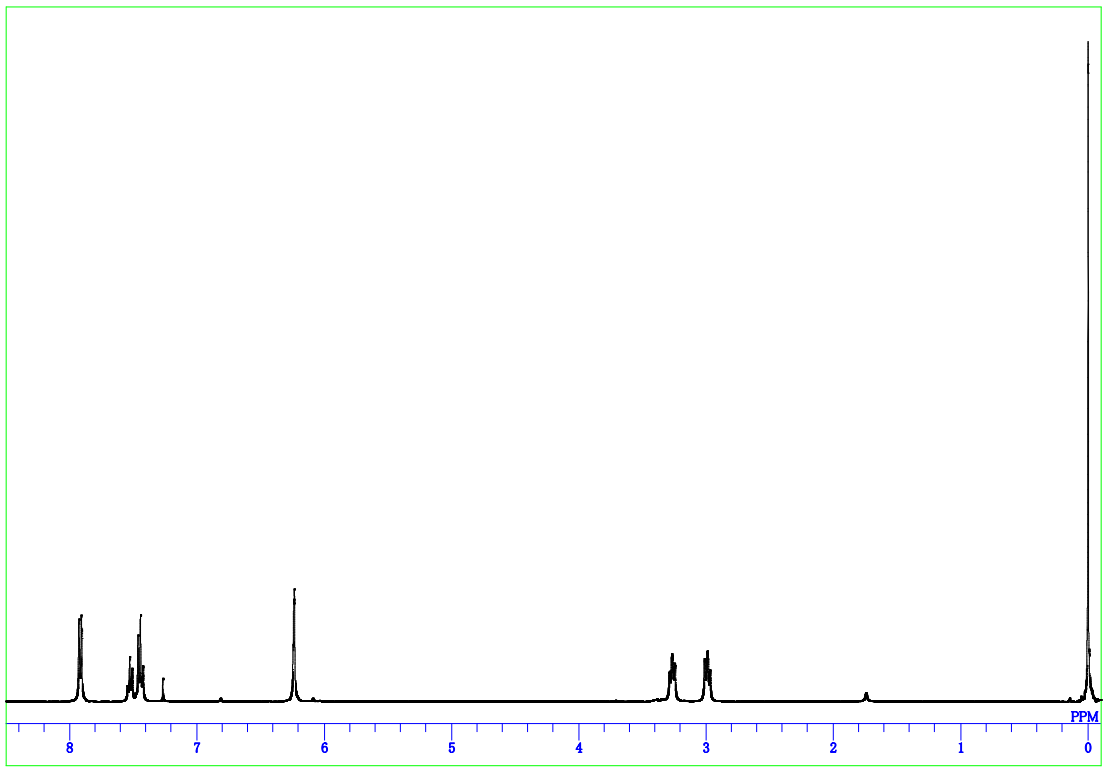

7-BCM

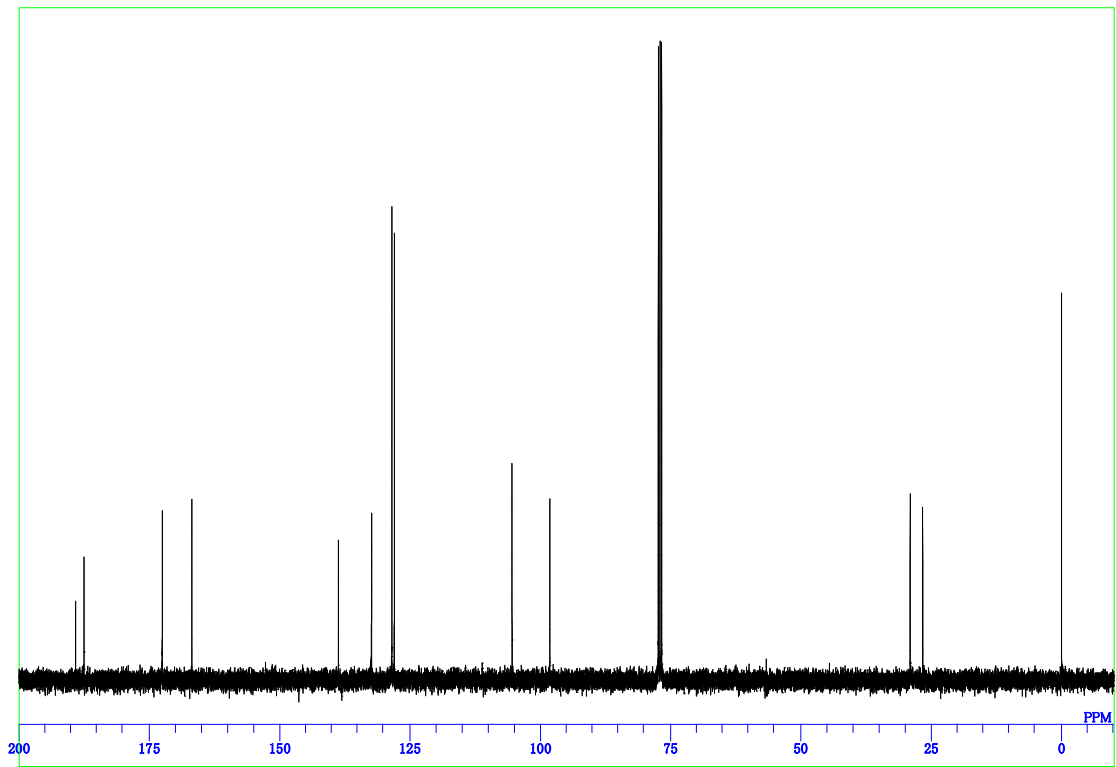

8-1H

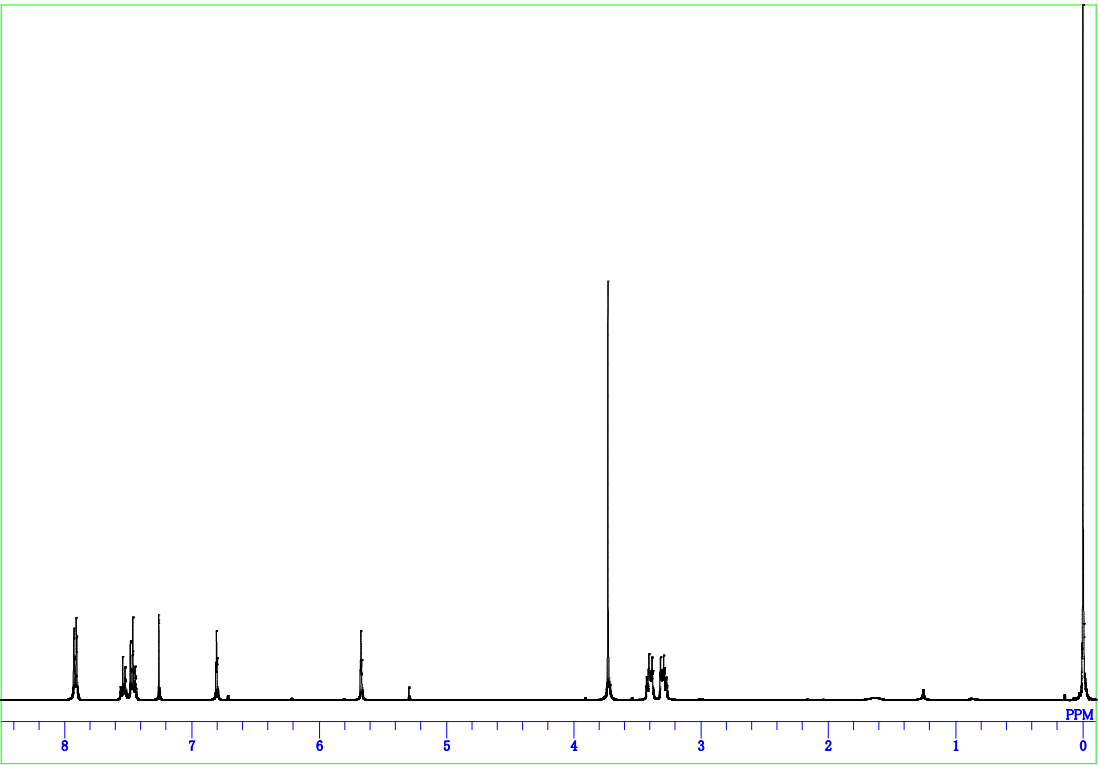

8-13C

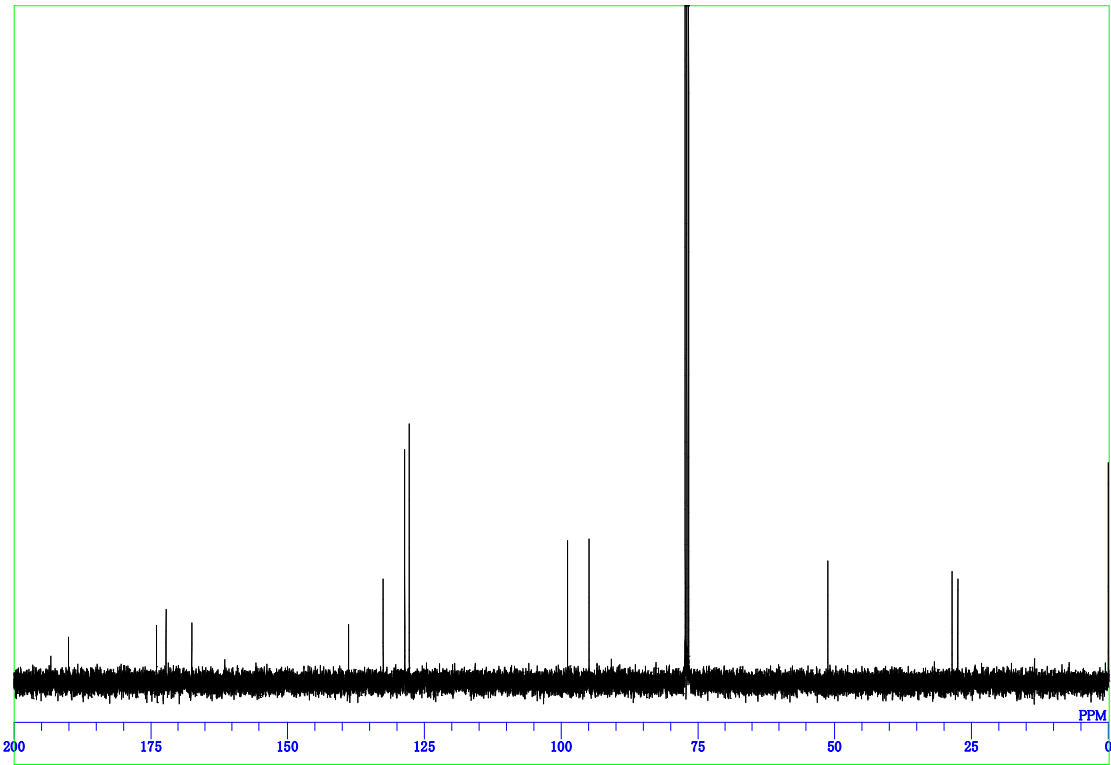

9a-1H

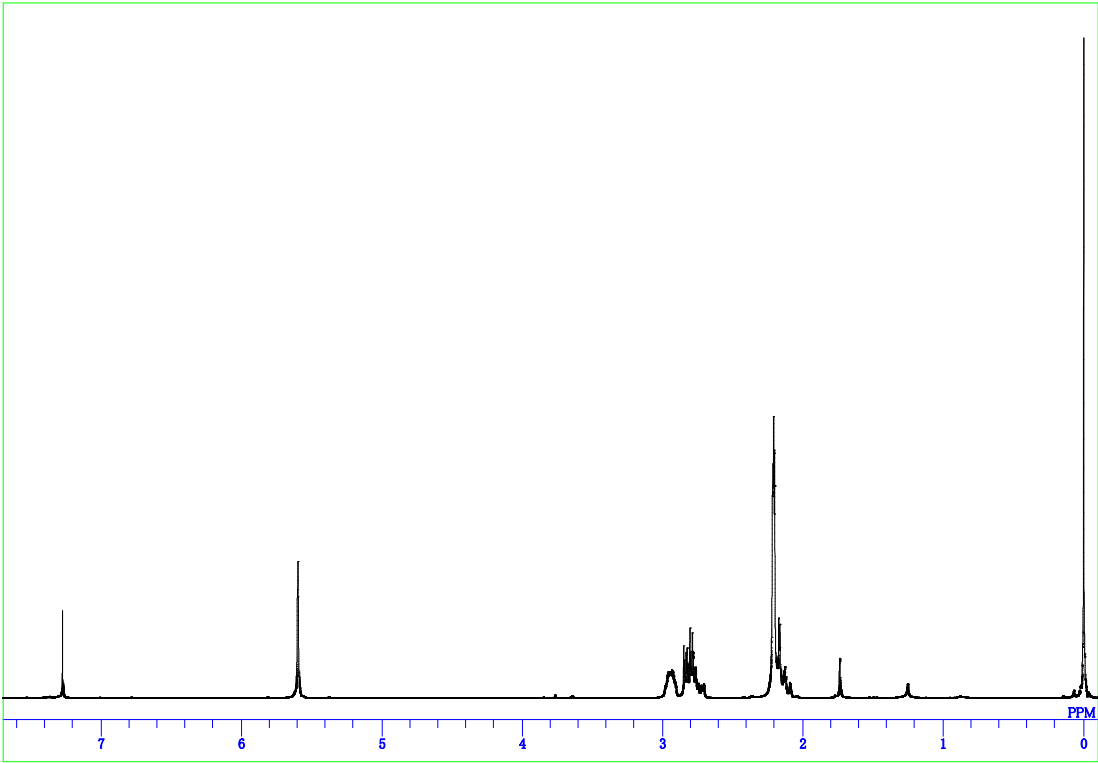

9a-13C

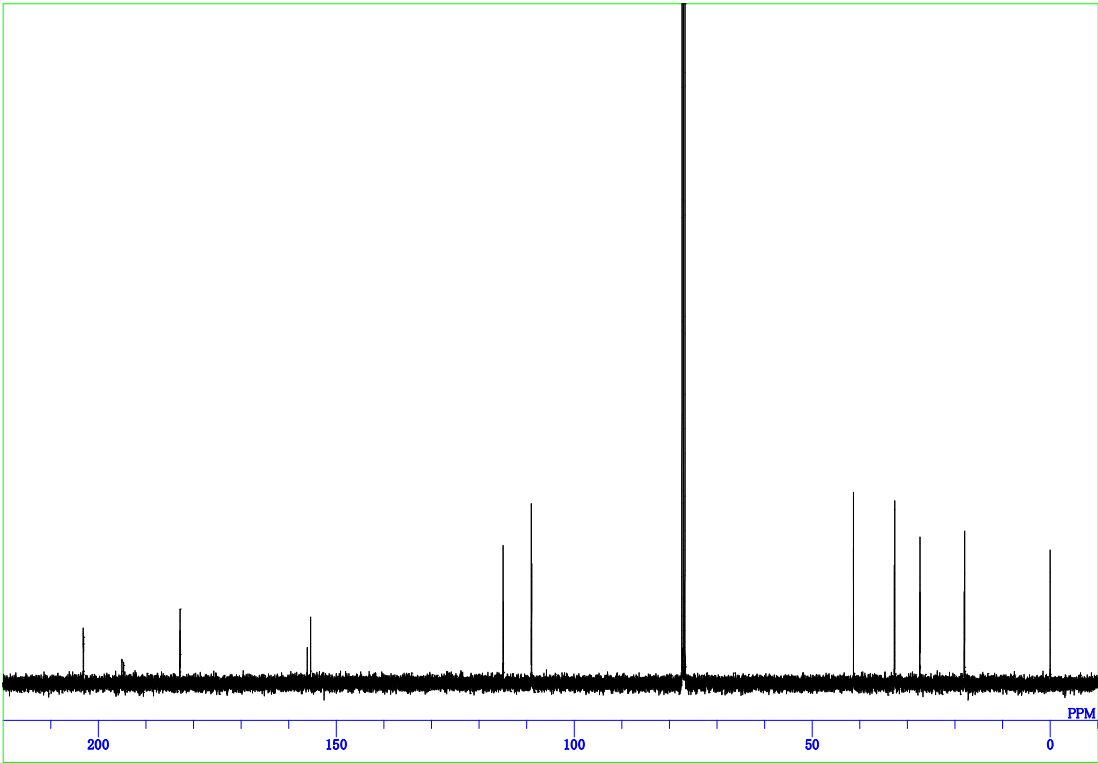

9b-1H

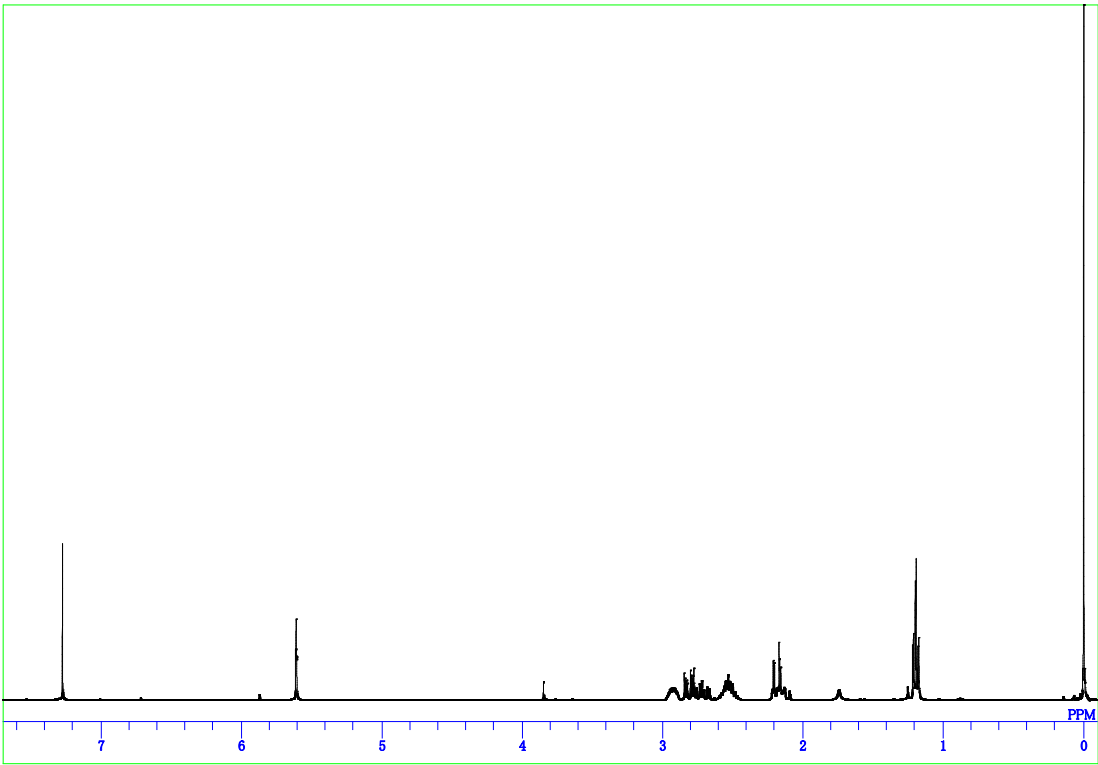

9b-13C

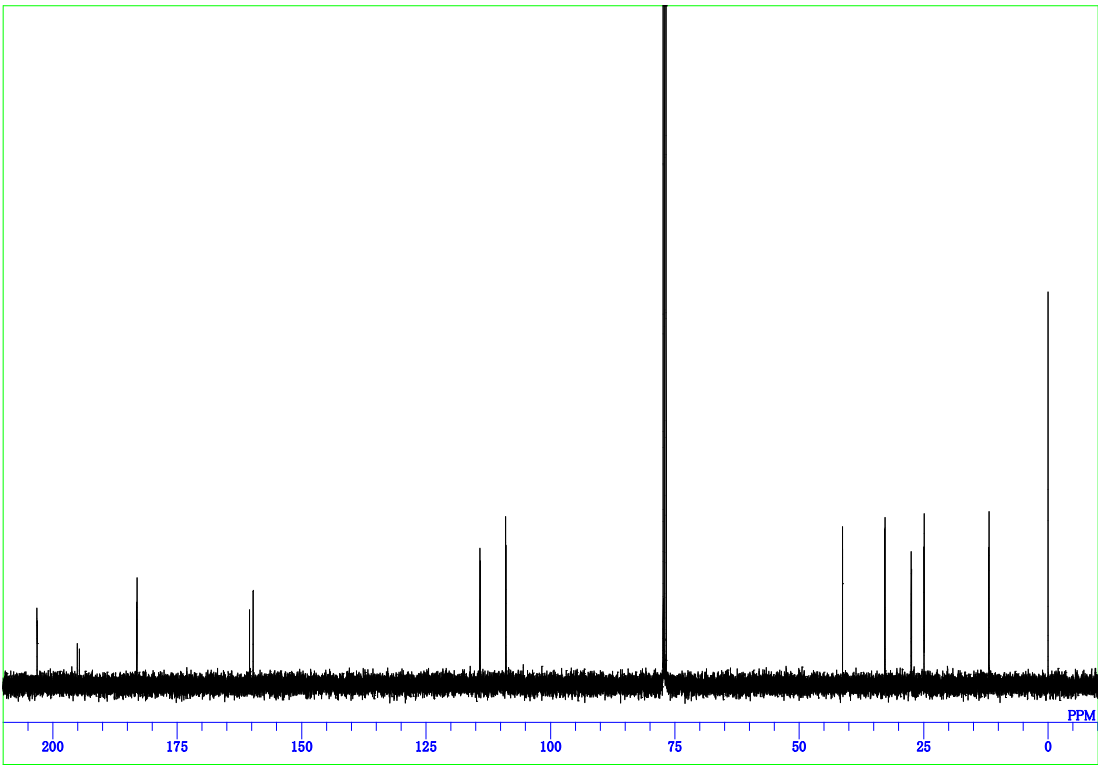



9c-1H

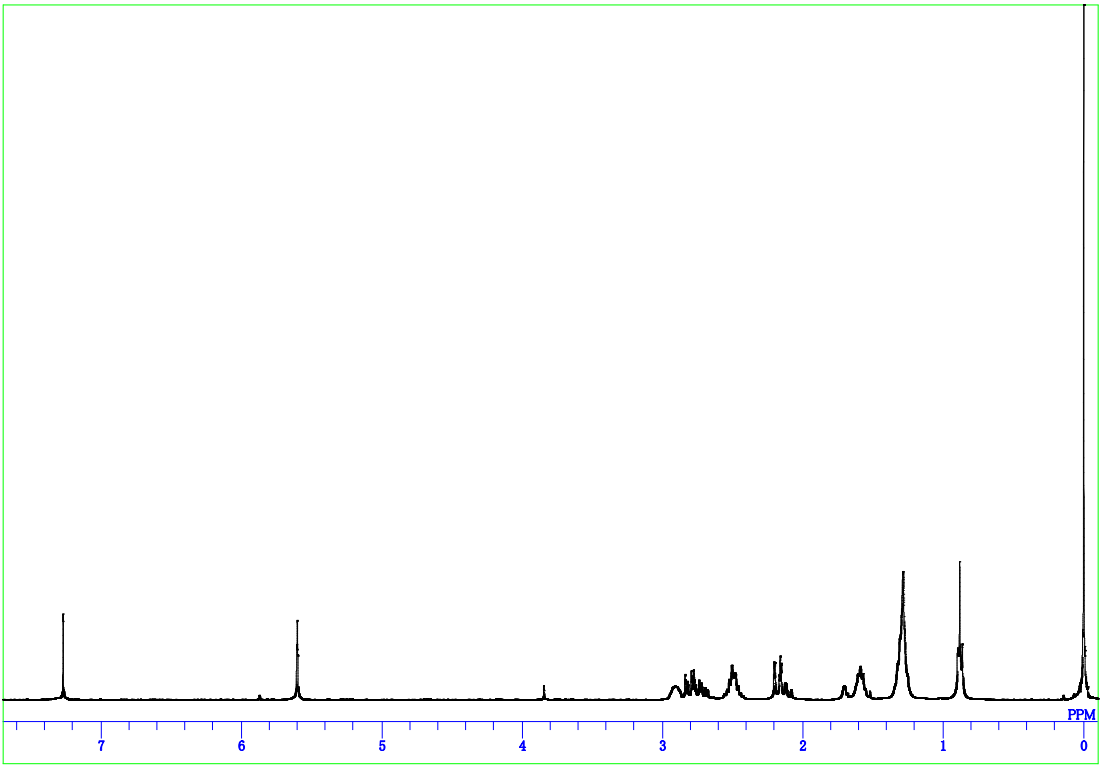

9c-13C

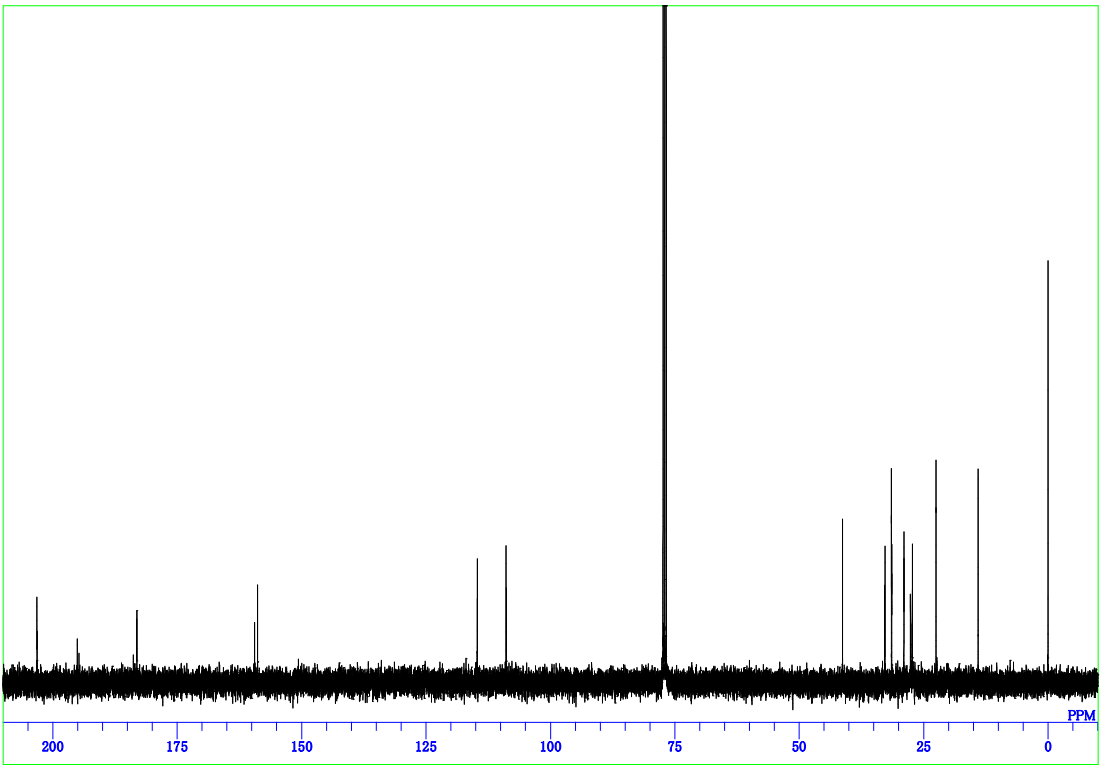

10c-1H

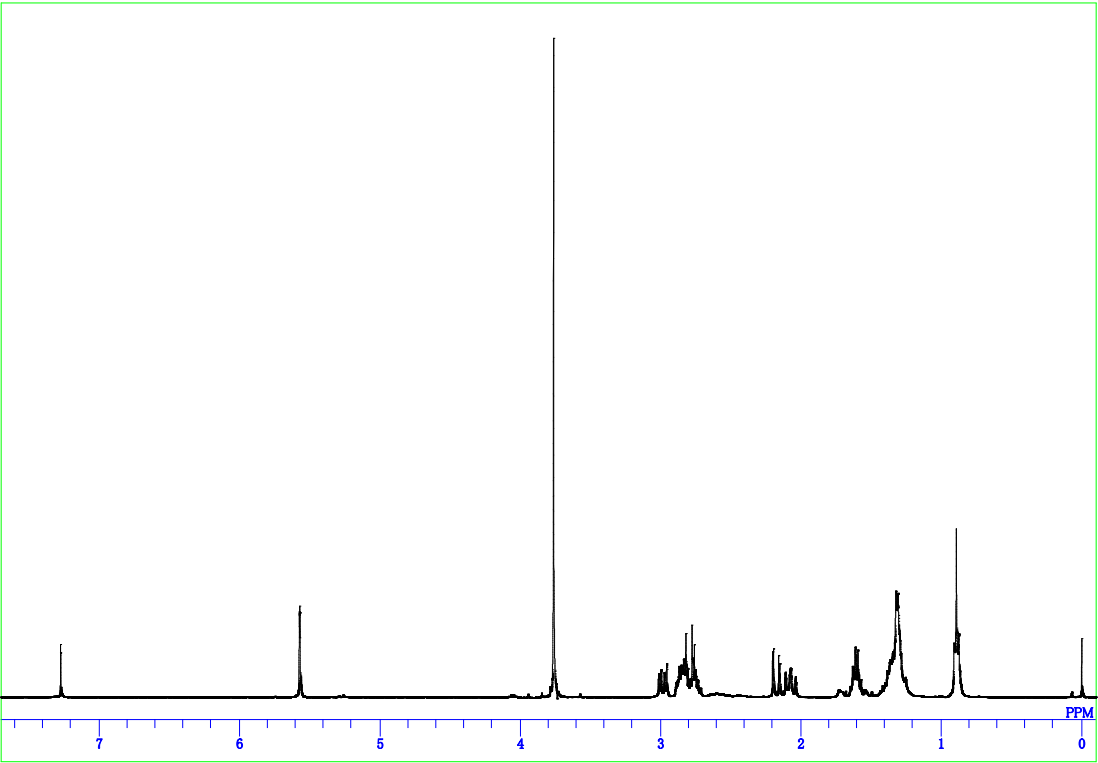

10c-13C

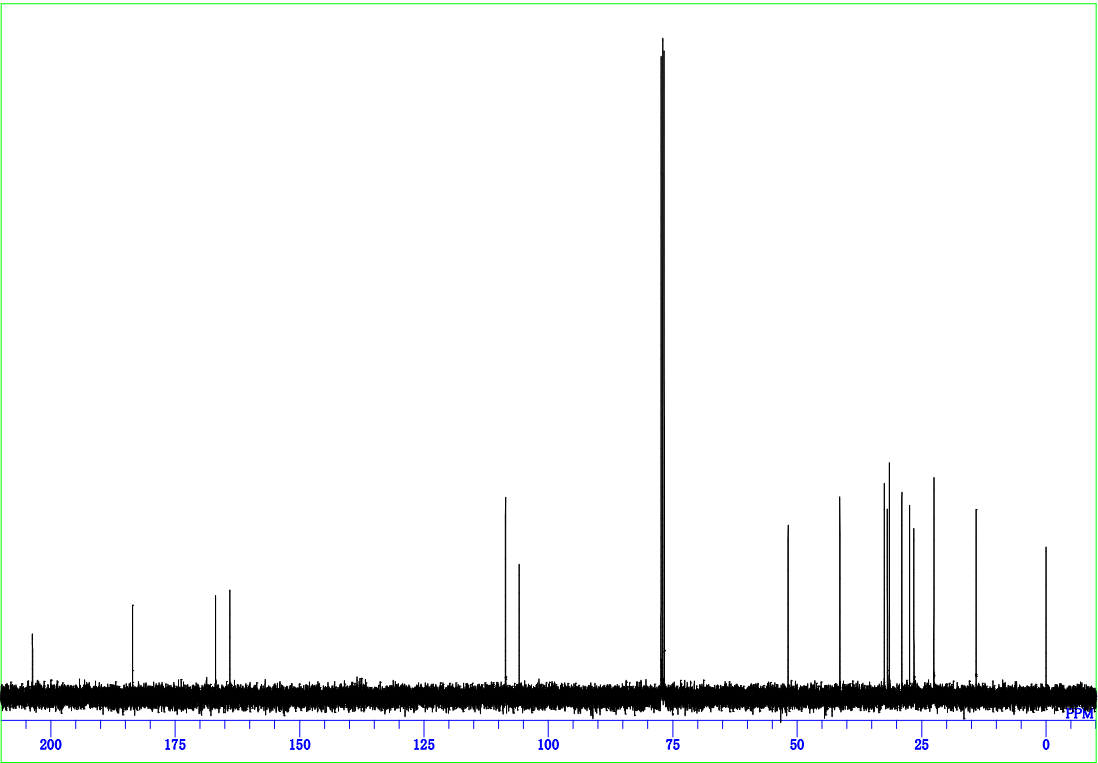

10d-1H

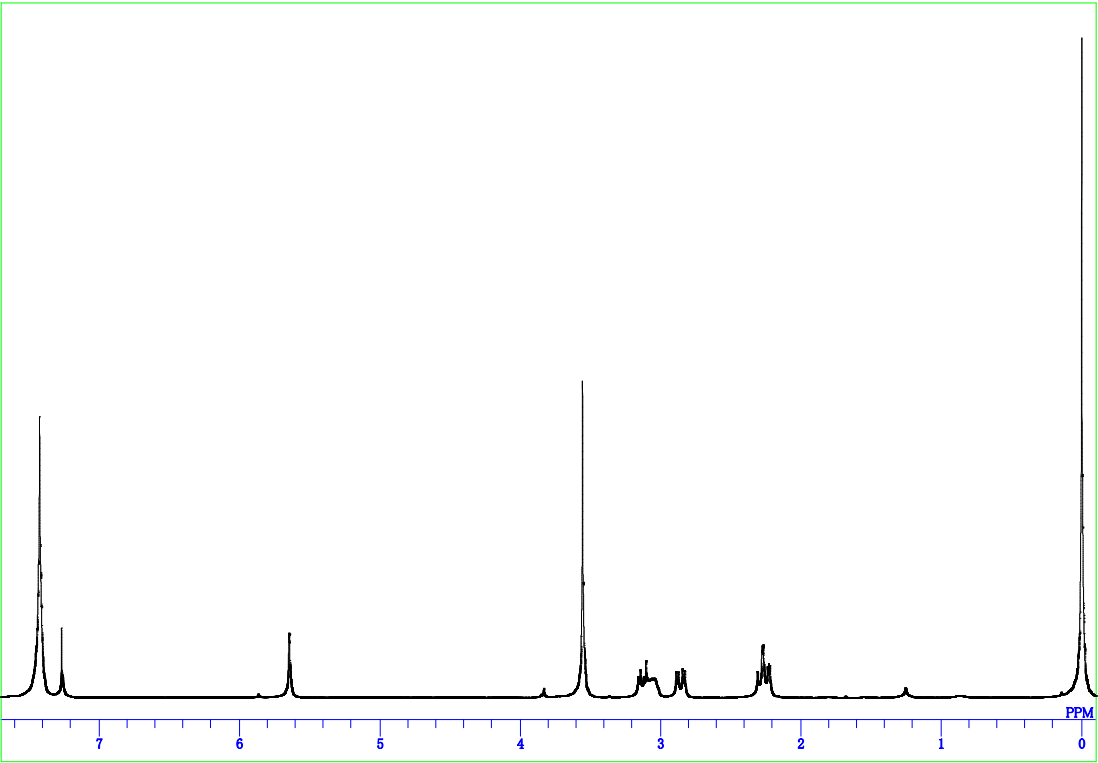

10d-BCM

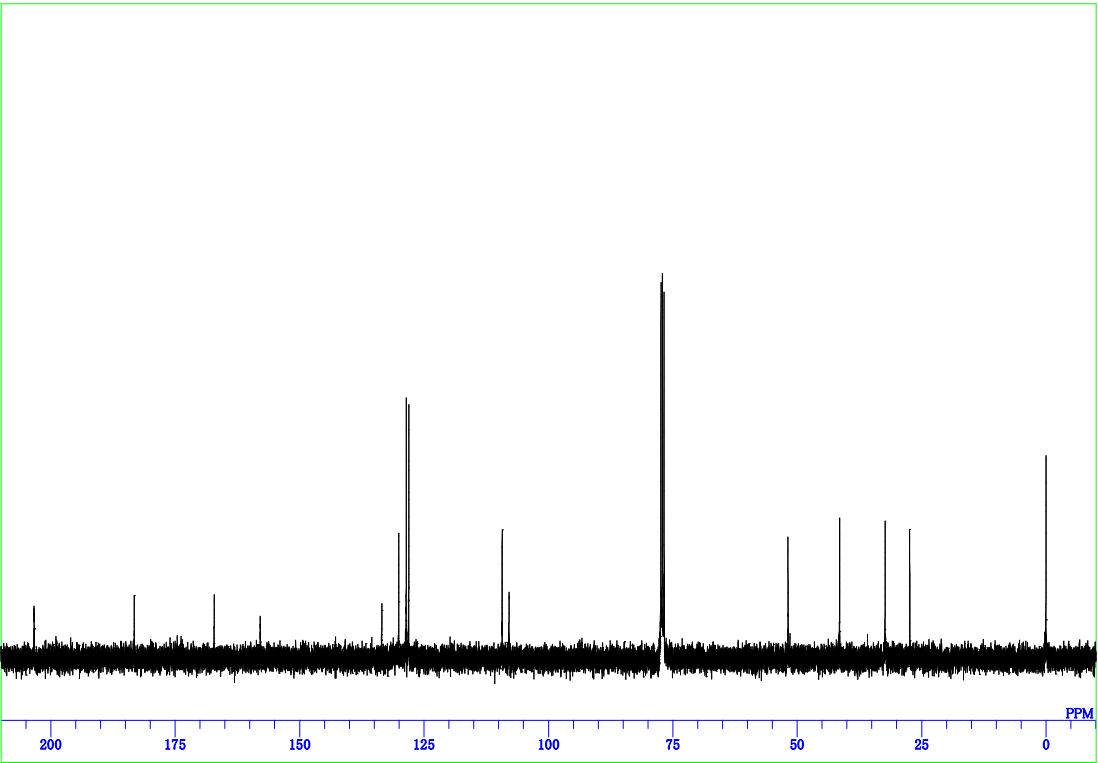

Supplement: c2ob07016b.pdf [file c2ob07016b.pdf]
